# Supplementary material for: Interferon gene therapy reprograms the leukemia microenvironment inducing protective immunity to multiple tumor antigens
Source: PubMed Central journal article supplement (PMC6057972; doi:10.1038/s41467-018-05315-0), 2018-07-24
Supplement: 41467_2018_5315_MOESM1_ESM.pdf [file 41467_2018_5315_MOESM1_ESM.pdf]

**Interferon gene therapy reprograms the leukemia microenvironment  
inducing protective immunity to multiple tumor antigens**

Escobar et al.,

**a**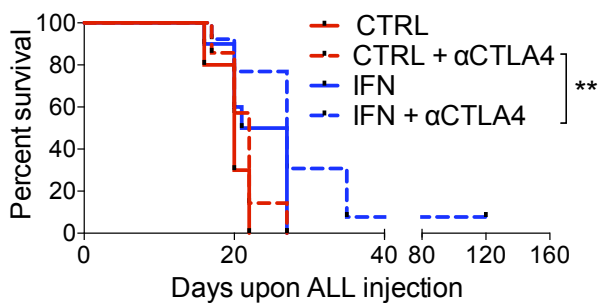**b**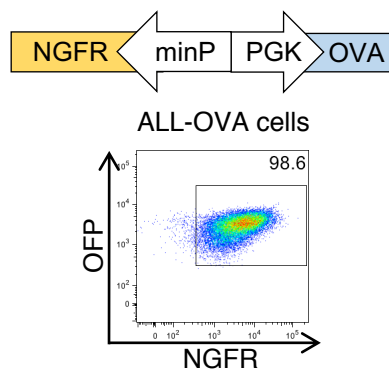**c**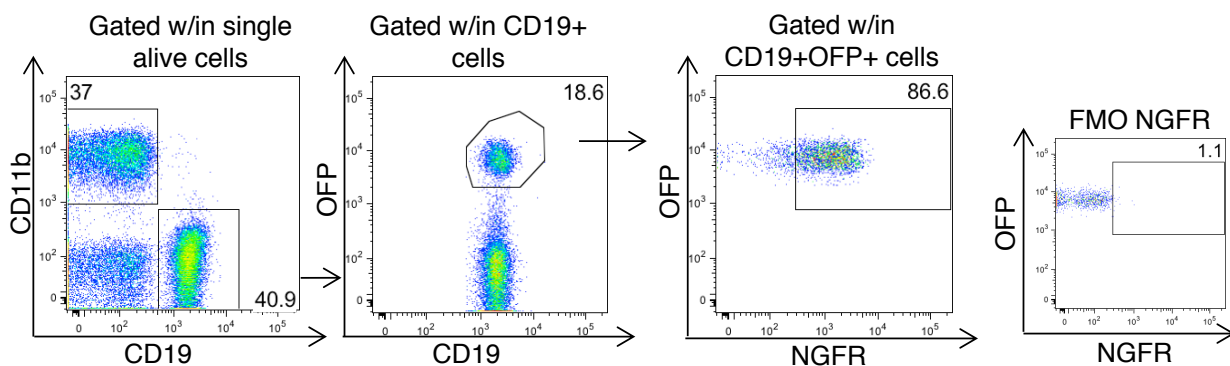**d**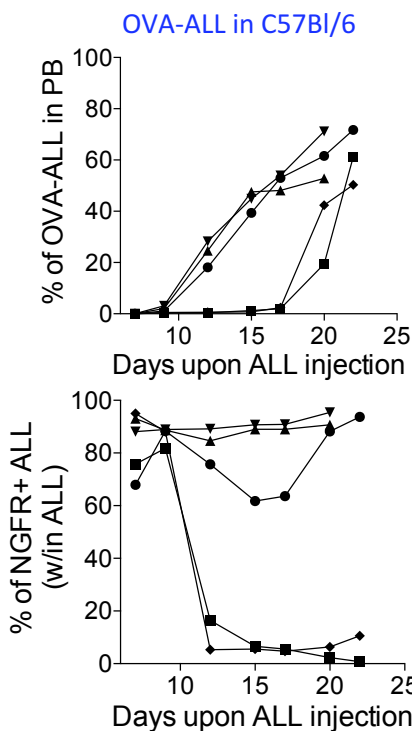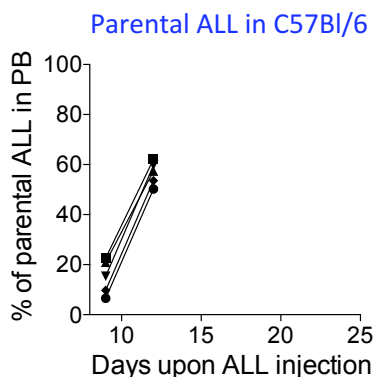**e**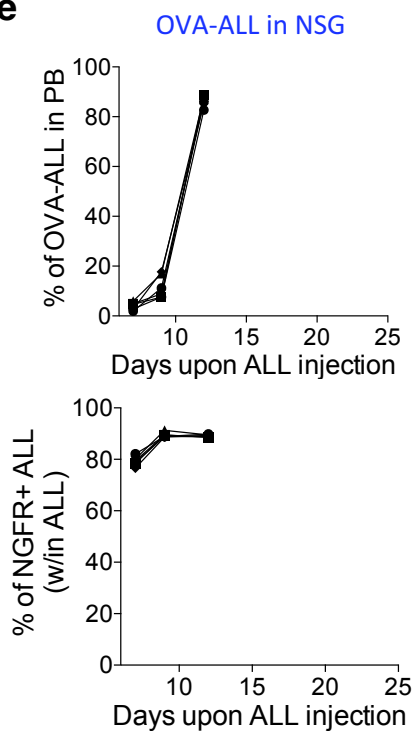**f**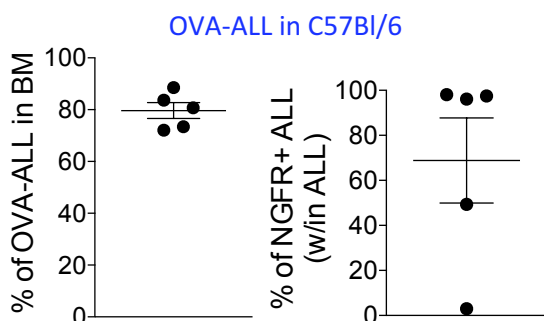**g**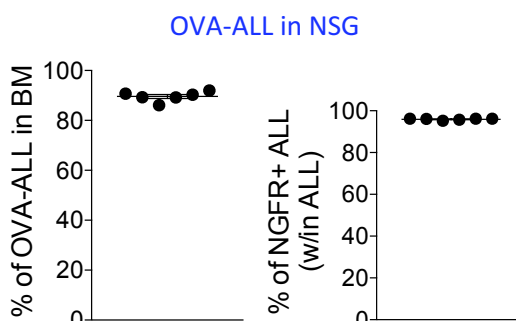

**Supplementary Figure 1. Engineered OVA-ALL showed increased immunogenicity as compared to parental ALL.** **a**, Survival curve of ALL-injected CTRL (n=10, treated with isotype control antibody), IFN (n=10, treated with isotype control antibody), CTRL +  $\alpha$ CTLA4 (n=14) and IFN +  $\alpha$ CTLA4 (n=13) mice. \*\*p<0.01, Mantel-Haenszel test. **b**, Schematic representation of the bidirectional LV (BdLV) used to generate OVA-ALL with representative plot showing NGFR expression on purified OVA-ALL. **c**, Gating strategy used to identify ALL (CD19+OFP+) and NGFR expression on ALL in PB of tumor-injected mice. **d**, **e**, Top: Percentage (mean  $\pm$  SEM) of OVA-ALL in the PB of immune-competent C57Bl/6 (n=5) (**d**) and immune-deficient NSG (n=6) (**e**) mice and of parental ALL in the PB of immune-competent C57Bl/6 (n=5) (**d**) mice. Bottom: expression of the NGFR marker on ALL present in the PB of immune-competent C57Bl/6 (n=5) (**d**) and immune-deficient NSG (n=6) (**e**) mice. Note that expression of NGFR and OVA antigens is co-regulated by a bidirectional promoter present within the lentiviral vector. **f**, **g**, Percentage (mean  $\pm$  SEM) of OVA-ALL and expression of NGFR marker on leukemic cells present in the BM of immune-competent C57Bl/6 (n=6) (**f**) and immune-deficient NSG (n=6) (**g**) mice at the time of sacrifice.

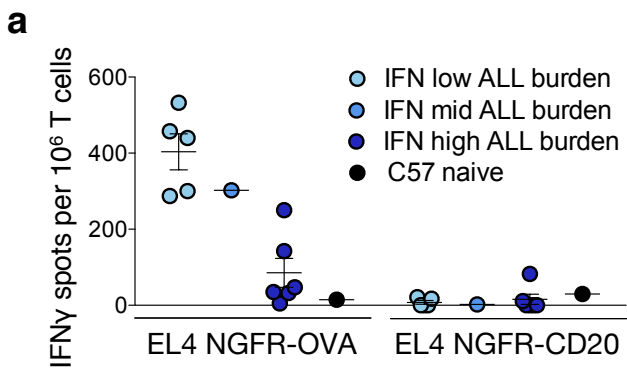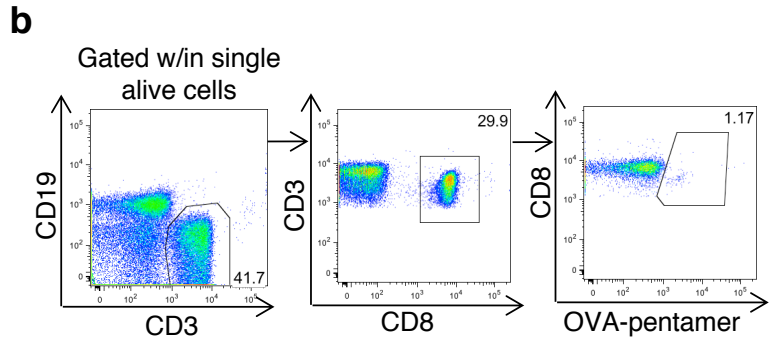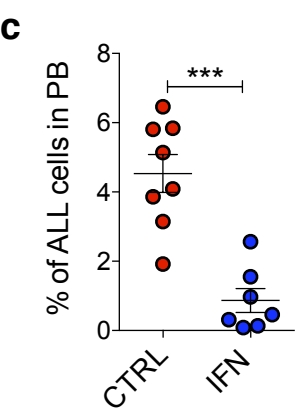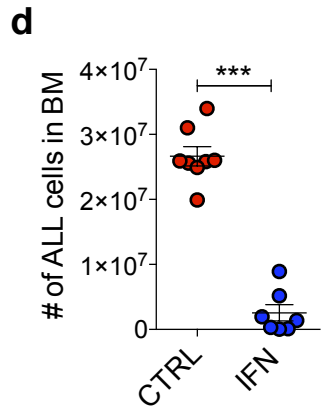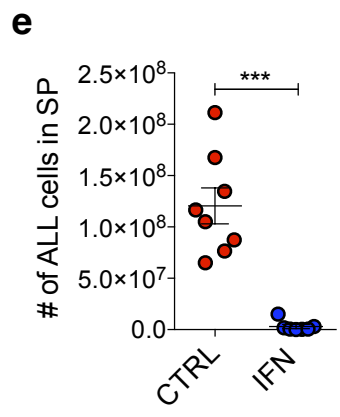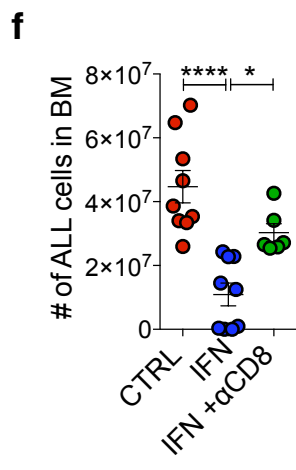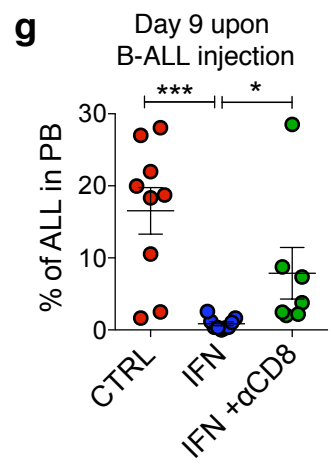



**Supplementary Figure 2. ALL growth inhibition and induction of OVA-specific T cells in IFN mice.** **a**, Splenic CD8<sup>+</sup> T cells from IFN mice, 13 days upon ALL-OVA injection, or from non tumor-bearing CTRL (naïve C57Bl/6, n=1) mice tested by IFN $\gamma$ -ELISPOT against the EL4 target cell line transduced with NGFR-OVA or NGFR-hCD20 bidirectional lentiviral vector. Each dot represents a mouse, mean  $\pm$  SEM. Low tumor burden (n=5): 5.2  $\pm$  4.9 (mean  $\pm$  SEM) % OVA-ALL; mid tumor burden (n=1): 33% OVA-ALL; high tumor burden (n=6): 51  $\pm$  4.9 % OVA-ALL. **b**, Gating strategy used to identify OVA-specific CD8<sup>+</sup> T cells in the PB of the mice. **c, d, e**, Percentage (**c**) and absolute numbers (**d, e**) (mean  $\pm$  SEM) of OVA-ALL in PB (**c**) and in BM and spleen (**d, e**) of IFN (n=14-6) and CTRL (n=15-8) mice, 9 days upon tumor injection. \*\*\*P<0.001, Mann-Whitney. Each dot represents a mouse. **f, g**, Absolute numbers and percentage of OVA-ALL in the BM (**f**, 16 days upon tumor challenge) and PB (**g**, 9 days upon tumor challenge) of IFN (n=9), CD8-depleted IFN (n=7) and CTRL (n=9) mice. Each dot represents a mouse. \*p<0.05, \*\*\*p<0.001, \*\*\*\*p<0.0001, Kruskal-Wallis with adjusted by Dunn's test.

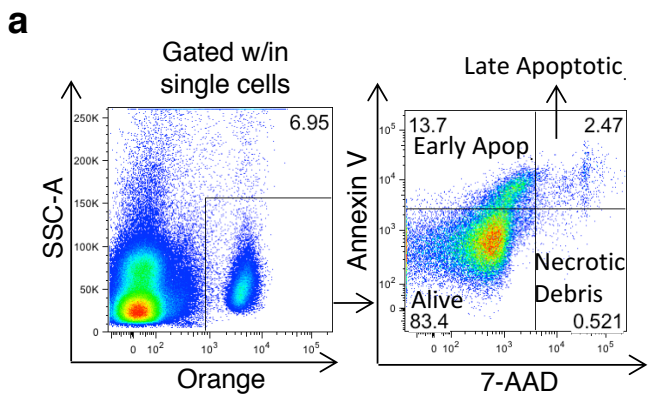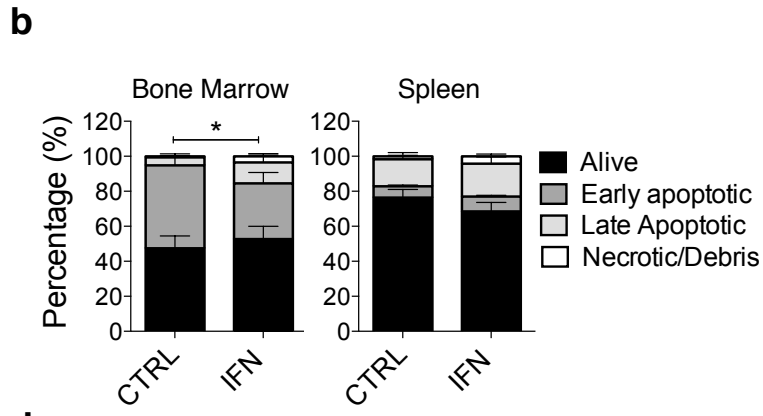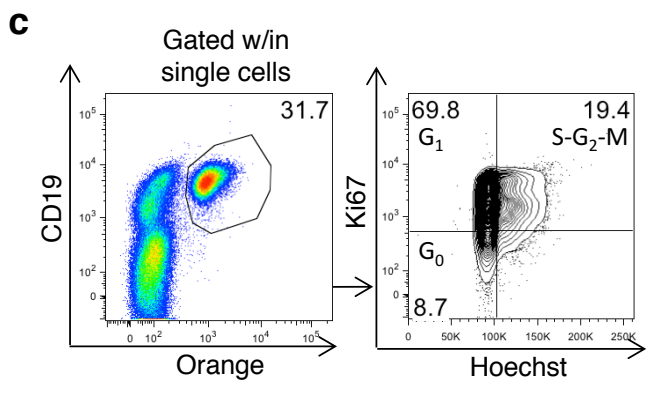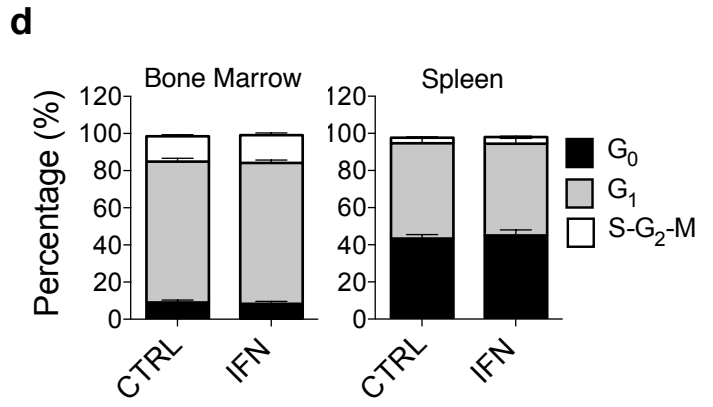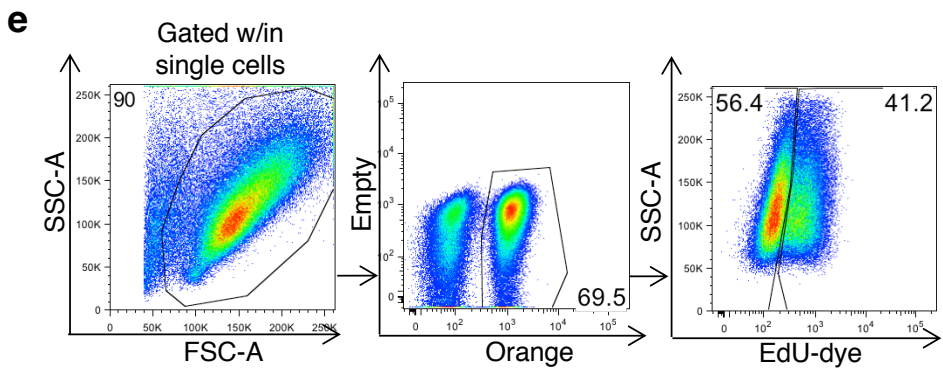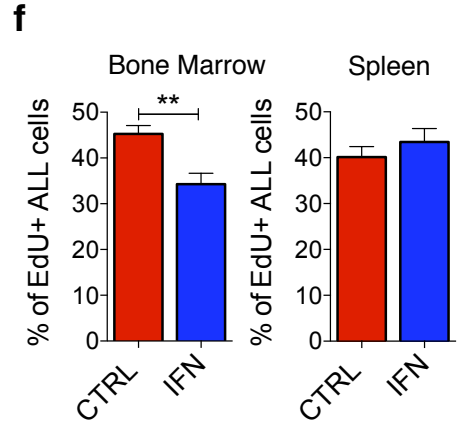

**Supplementary Figure 3. Gating strategy used to assess apoptosis, cell cycle distribution and proliferation rate of ALL cells. a, b,** Gating strategy (**a**) and analysis (**b**) (percentage, mean  $\pm$  SEM) of early apoptotic (Annexin+7-AAD-), late apoptotic (Annexin+7-ADD+), dead/necrotic (Annexin-7AAD+) and alive (Annexin-7-AAD-) OVA-ALL cells present in BM and spleen of IFN (n=11) and CTRL (n=15) mice, 9 days upon tumor injection. \*p<0.05, Mann-Whitney. **c, d,** Gating strategy (**c**) and analysis (**d**: percentage, mean  $\pm$  SEM) of OVA-ALL distribution in the G<sub>0</sub> (Ki67-Hoechst<sup>low</sup>), G<sub>1</sub> (Ki67+Hoechst<sup>low</sup>) and S-G<sub>2</sub>-M (Ki67+Hoechst<sup>high</sup>) phase of the cell cycle in BM and spleen of IFN (n=11) and CTRL (n=15) mice, 9 days upon tumor injection. **e, f,** Gating strategy (**e**) and analysis (**f**: percentage, mean  $\pm$  SEM) of proliferating EdU+ ALL cells present in BM and spleen of IFN (n=11) and CTRL (n=15) mice, 9 days upon OVA-ALL injection. \*\*p<0.01, Mann-Whitney.

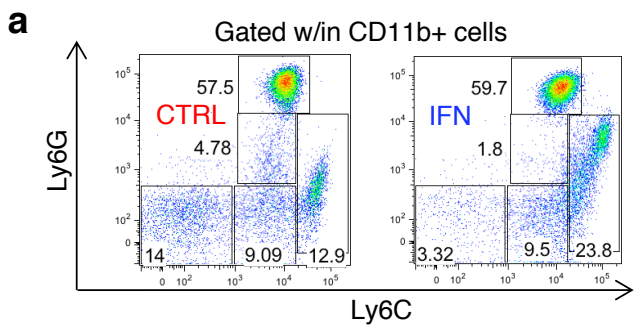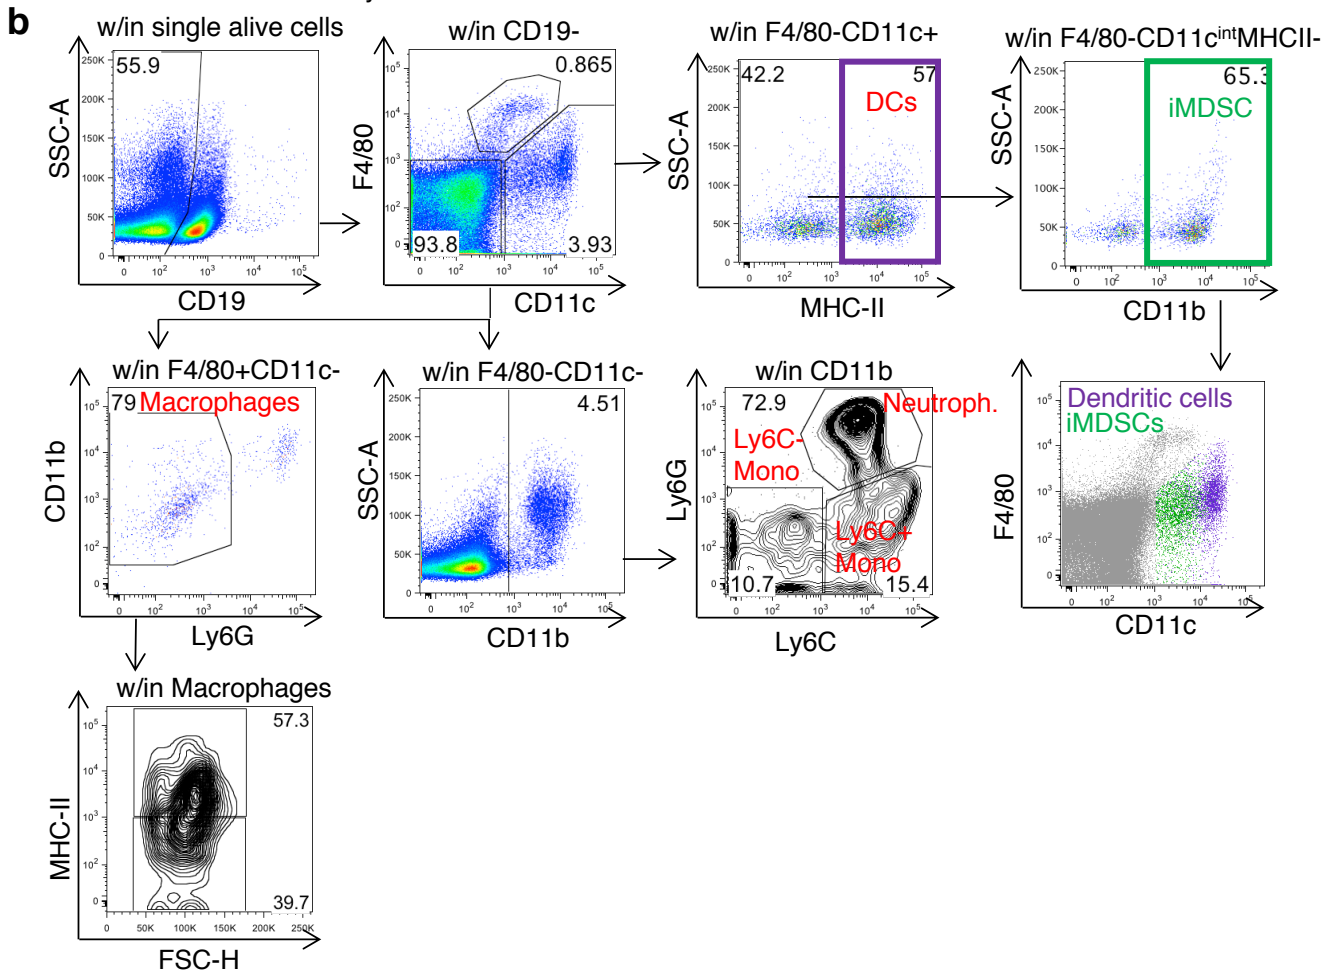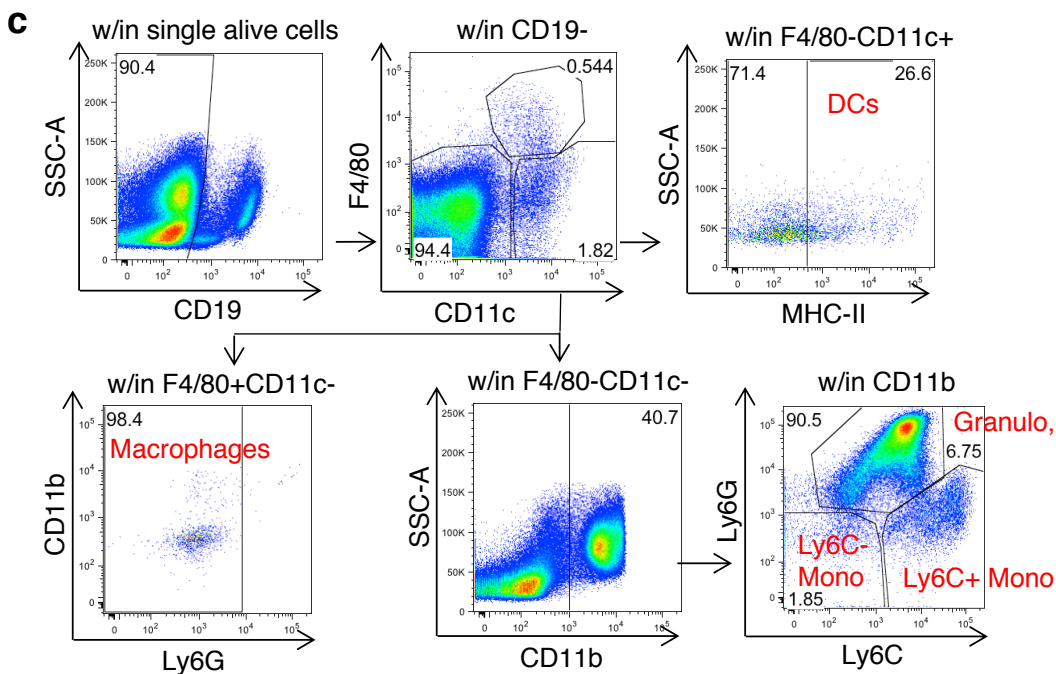

**Supplementary Figure 4. Flow cytometric analysis of immune cells in the peripheral blood, spleen and BM of tumor-bearing and non tumor-injected IFN and CTRL mice.** **a**, Representative plots showing the distribution of neutrophils (Ly6G+Ly6Cint), classical monocytes (LyC+Ly6Gint), non-classical monocytes (Ly6C-Ly6G-) and Ly6CintLy6G- cells within total myeloid cells in the PB of CTRL and IFN mice. **b, c**, Gating strategy of the indicated populations in the spleen (**b**) and BM (**c**) of tumor-free and OVA-ALL-injected IFN and CTRL mice (CTRL: n=3, IFN n=2, CTRL + ALL: n=9, IFN + ALL: n=7), 10 days upon tumor injection. Macrophages (M $\Phi$ ) are identified as CD19-CD11c-CD11b+Ly6G-F4/80+ cells. Splenic macrophages are further distinguished into MHC-II+ and MHC-II- M $\Phi$  using the IAb (MHC-II) marker. We distinguished CD19-F4/80-CD11c+MHCII-CD11b+ immature myeloid derived suppressor cells (iMDSCs) from the CD19-F4/80-CD11c+MHCII+ dendritic cells (DC). We defined granulocytes as CD19-F4/80-CD11c-CD11b+Ly6CintLy6G+, classical monocytes as CD19-F4/80-CD11c-CD11b+Ly6C+Ly6G- and non classical monocytes as CD19-F4/80-CD11c-CD11b+Ly6C-Ly6G-.

**a** IFN+ALL vs ALL

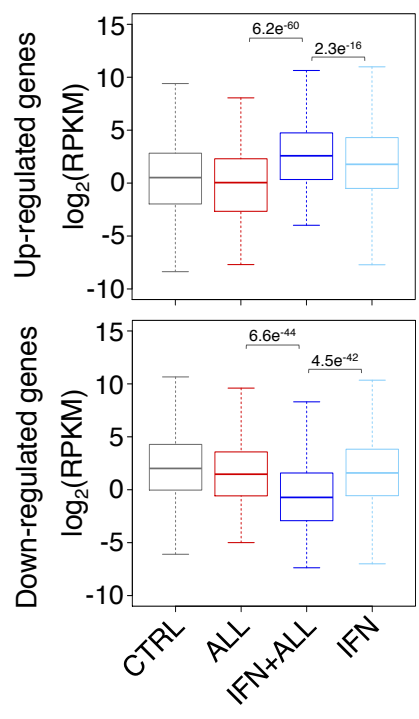

**b**

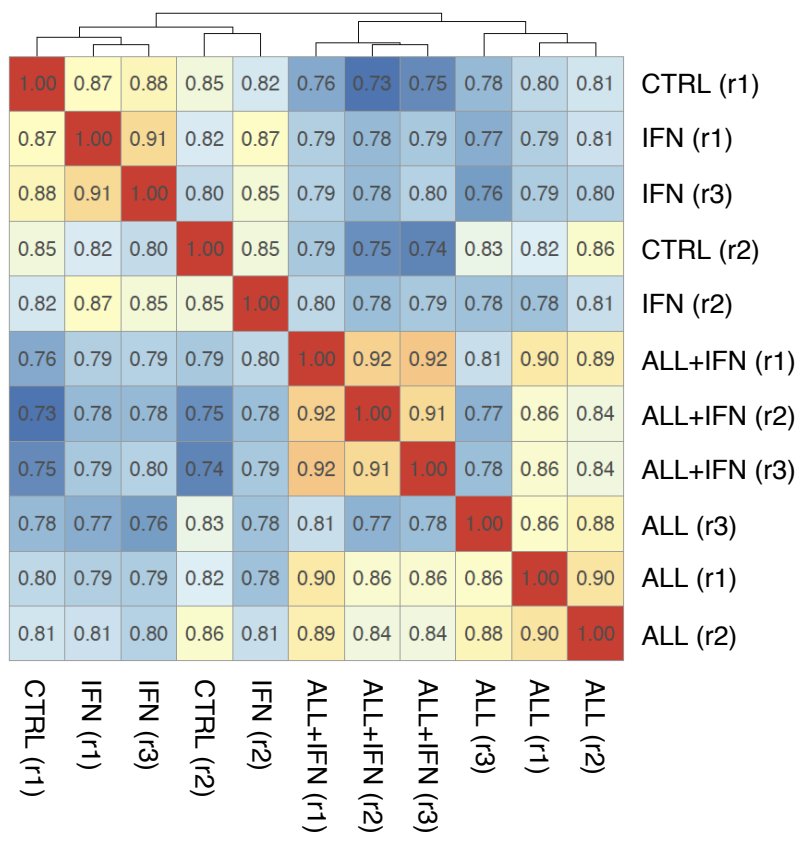

**Supplementary Figure 5. Bulk RNA-Seq analyses in splenic macrophages.** **a**, Box plots showing expression levels, in the indicated conditions, of up-regulated (n=213) or down-regulated (n=258) genes in macrophages from ALL mice treated with IFN gene therapy (IFN+ALL) as compared to ALL controls. Numbers represent results of Wilcoxon signed-rank test in the indicated comparisons. **b**, Heatmap of correlation between RNA-Seq datasets in macrophages from the indicated conditions. Numbers indicate calculated coefficients of determination ( $R^2$ ). Samples are ordered based on unsupervised hierarchical clustering.

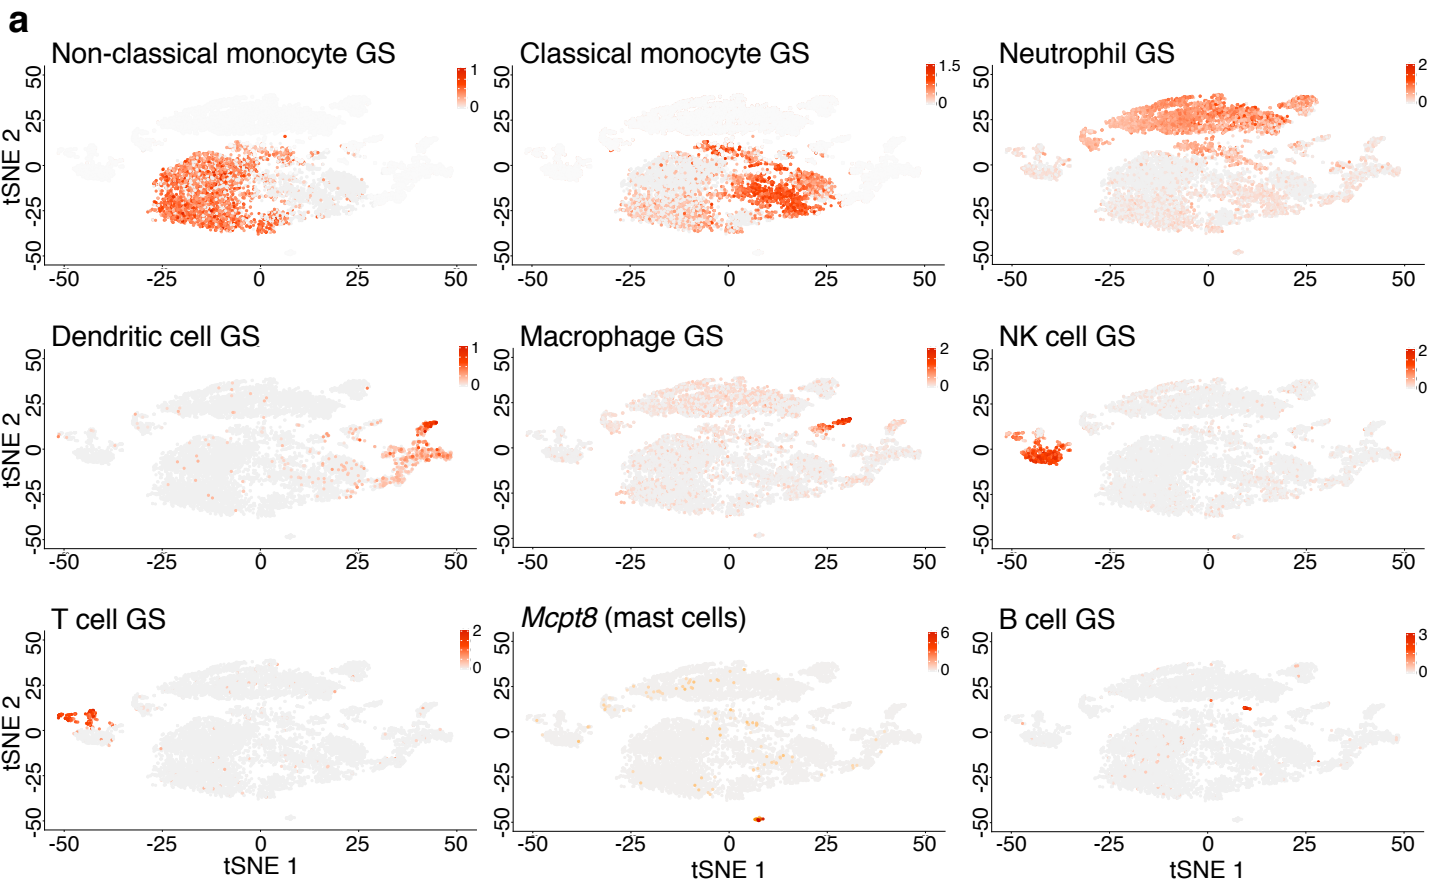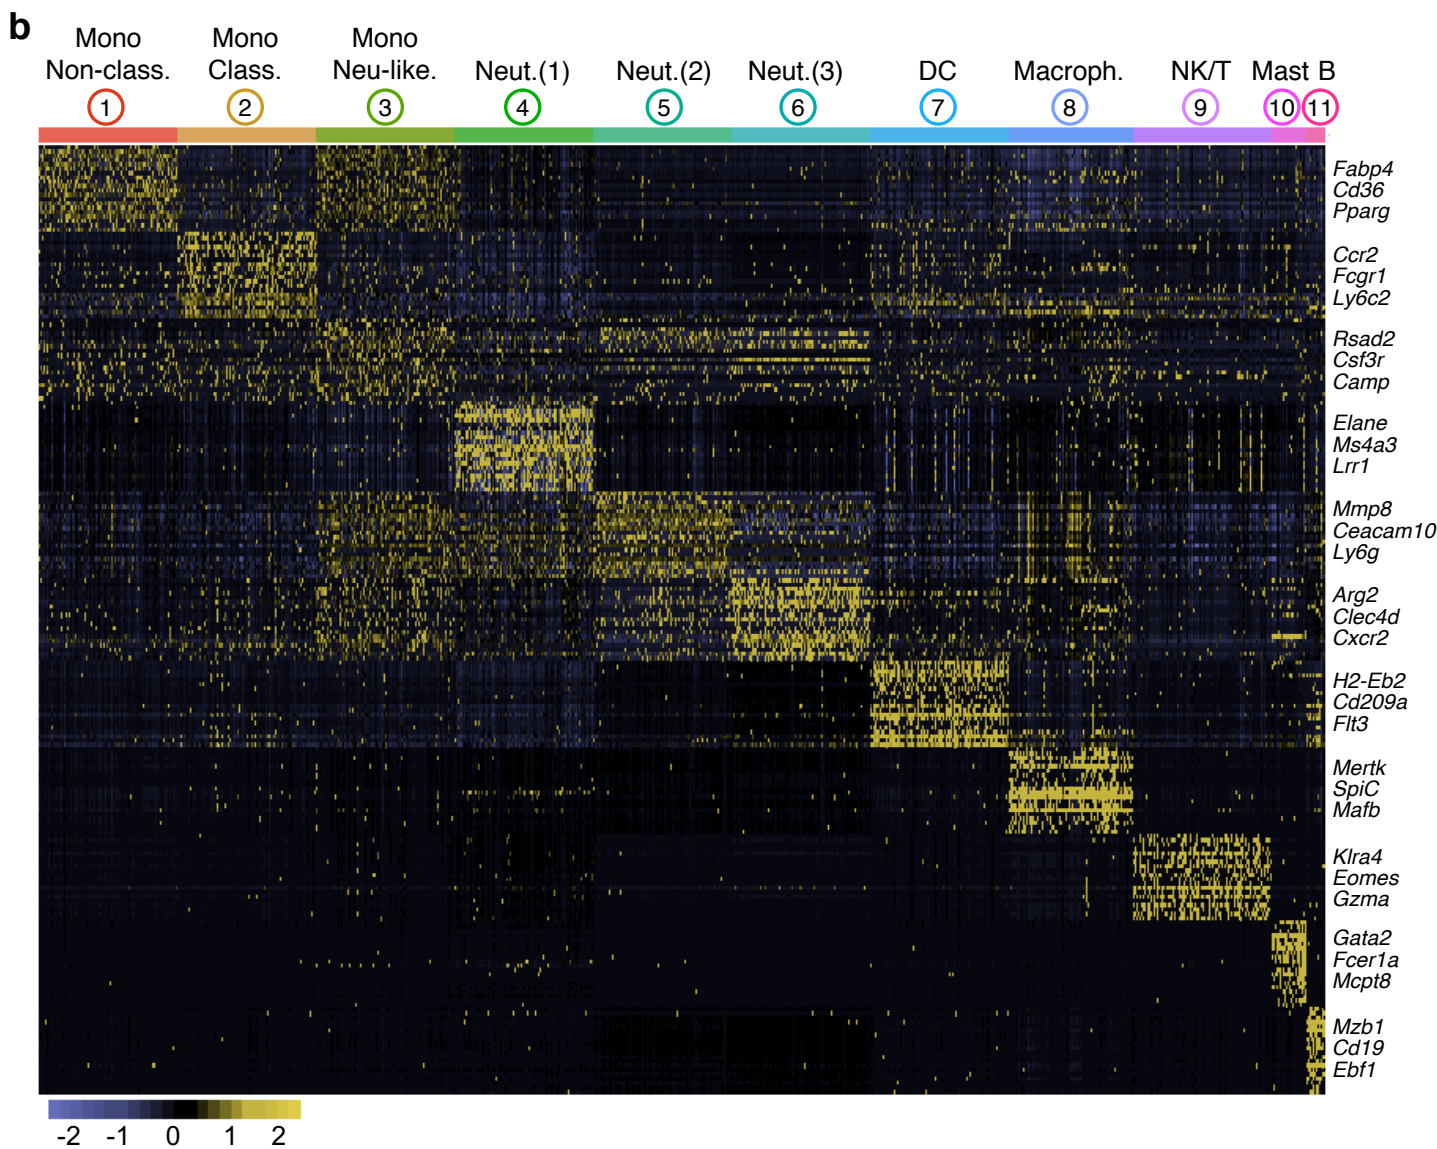



**Supplementary Figure 6. Cell type identification in scRNA-Seq data from splenic CD11b<sup>+</sup> cells.** **a**, tSNE plots showing single-cell expression levels of the indicated gene signatures (GS). Non-classical monocytes: Cd300e, 1700011I03Rik, Tspan9, Dmpk, Fxyd2; classical monocytes: Ly6c2, Tarm, Tfec, Psrc1, Mmp8; neutrophils: Il1f9, Pglyrp4, Nlrp12, Mrgpra2b, Mmp8, Ltf, Amer2, Stfa2l1, Gm5483; dendritic cells: Adam23, Procr, Mab21l3, Sucnr1, Fndc5, Rnf186, Flt3, Cd207, Adam11, Apol7c, Htr7; macrophages: Vcam1, Mertk, Actn1, Fcna, Crip2, Spic, Kcna2, Gfra2, Stab2, Jup; NK cells: Khdc1c, Khdc1b, Phactr3, Col8a2, Klra4, Adamts14, Gzma, Cma1, Gzmb, Clip4; T cells: Cd3g, Cd3e, Bcl11b, Actn2, Camk4; B cells: Pax5, Cd79a, Cd19, Chst3, Scn4a, Cacna1i, Ly6d, Klhl14, Mzb1. Colour scale reflects average expression (log transformed TPM) across genes within each signature. **b**, Heatmap showing expression (scaled log transformed TPM values) of top 20 discriminative genes for each cluster. Selected representative genes for each cluster are shown on the right. Up to 200 single cells are shown for each cluster.

● CTRL ● IFN ● ALL ● IFN+ALL (responder)

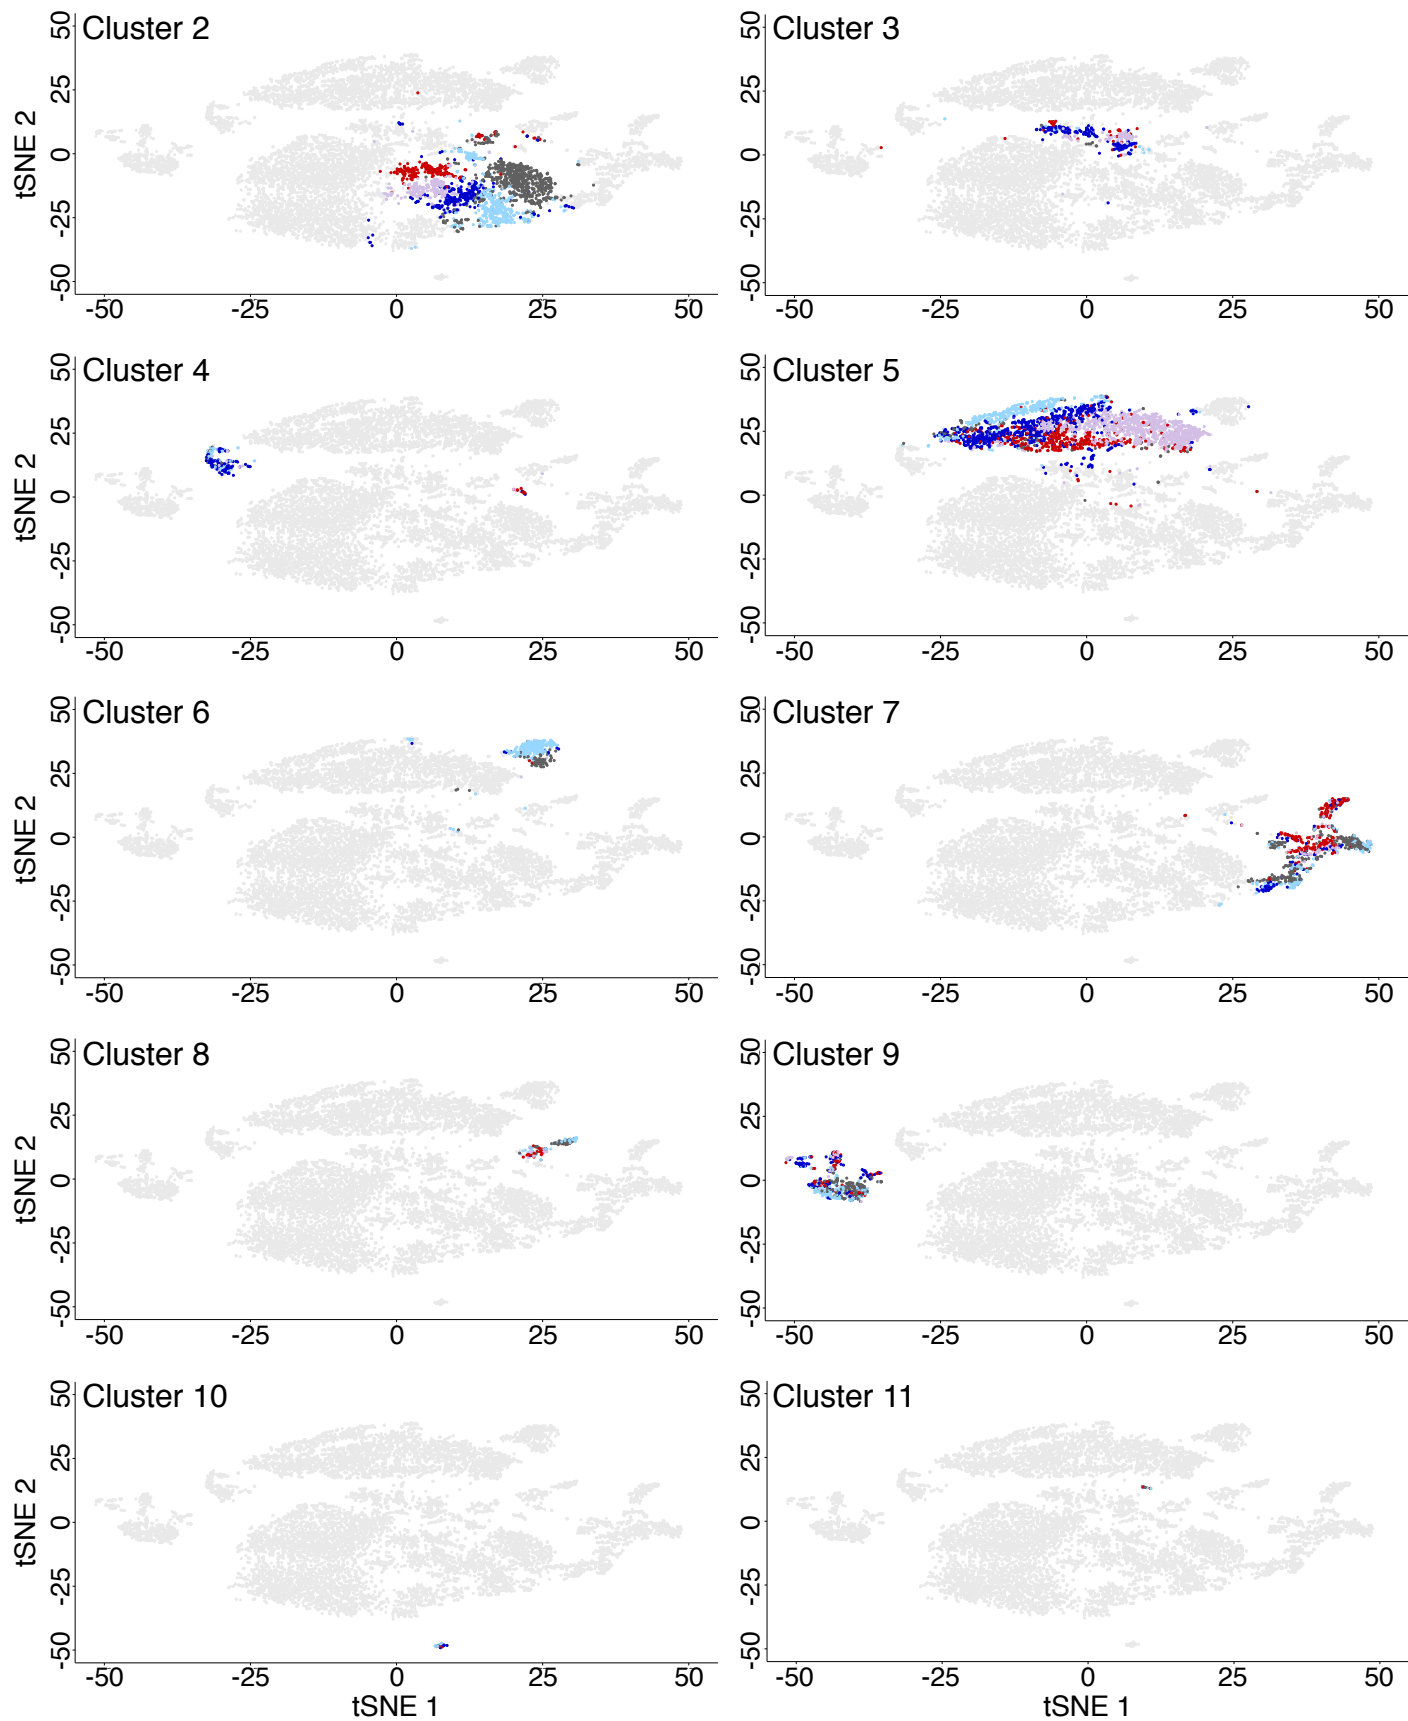

**Supplementary Figure 7. Leukemia and IFN-induced changes in scRNA-Seq data on splenic CD11b<sup>+</sup> cells.** tSNE plots showing scRNA-Seq data from clusters 2-11, coloured based on the experimental condition.

**a**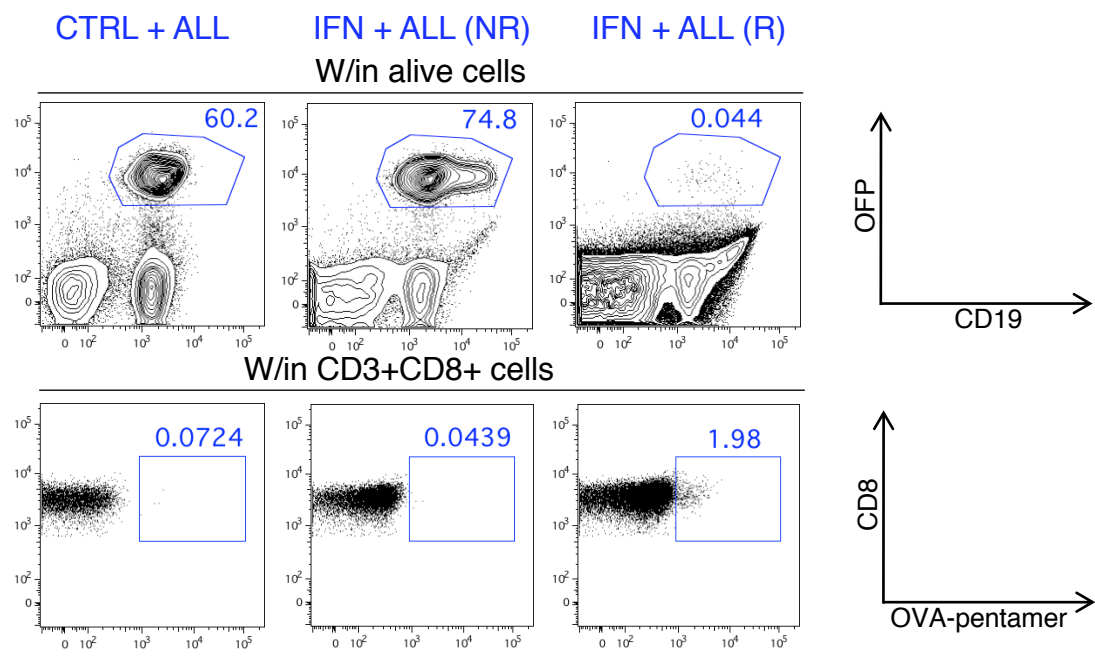**b**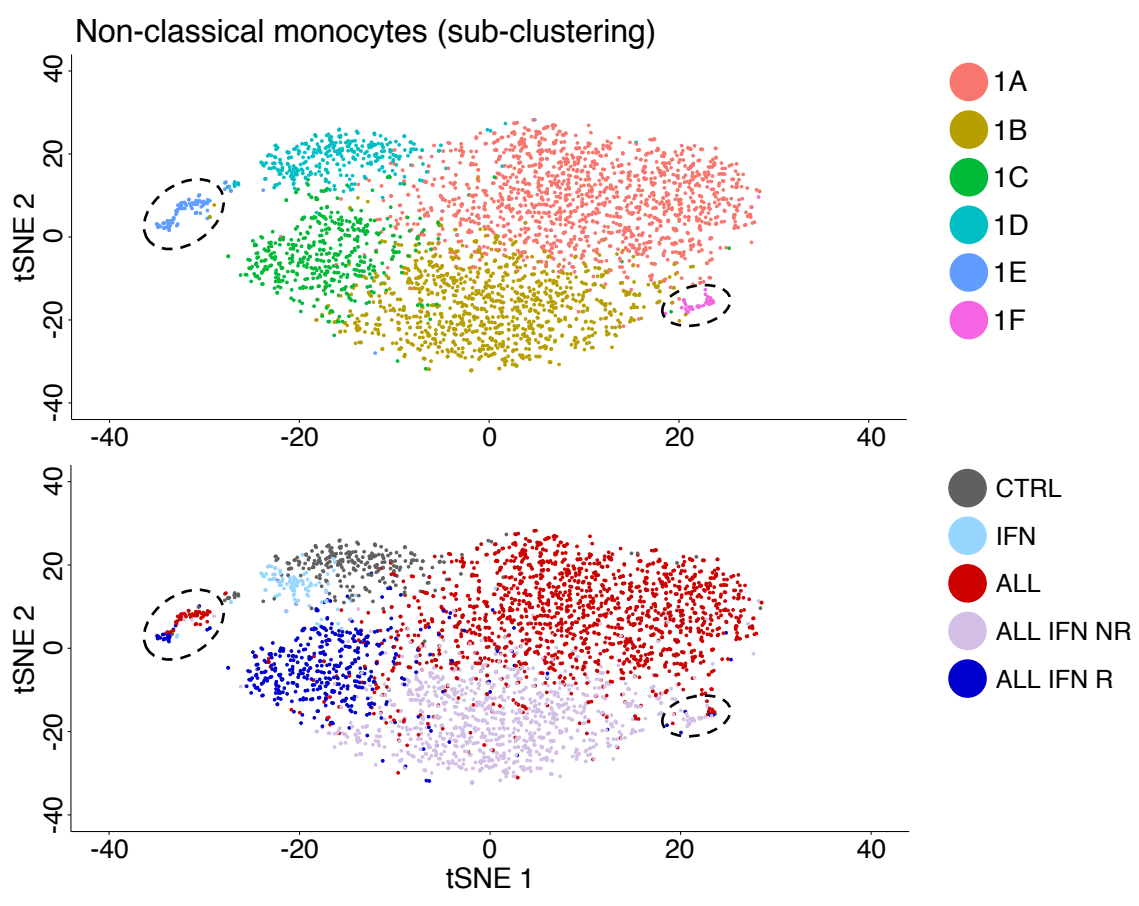**c**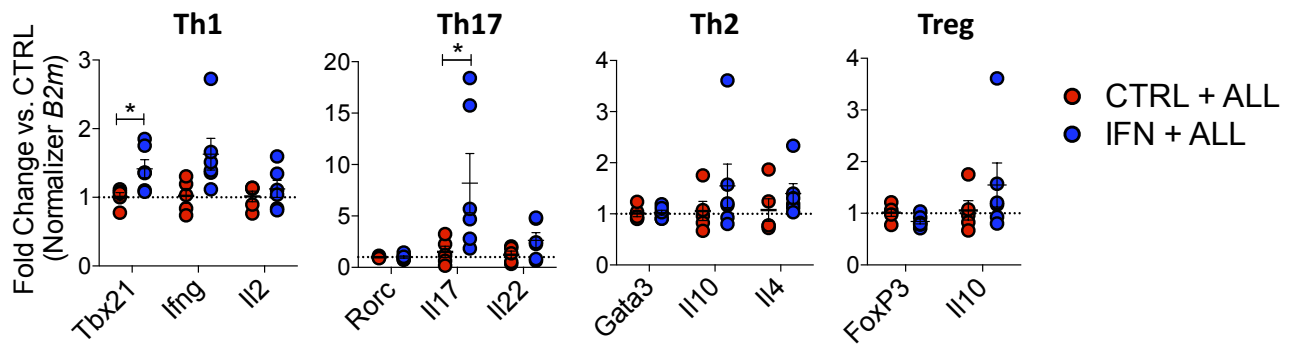

**Supplementary Figure 8. Sub-clustering analysis of scRNA-Seq data from non-classical monocytes and gene expression analyses on CD4 T cells.** **a**, Flow cytometric plots showing OVA-ALL cells (top) and OVA-specific CD8 T cells (bottom) present in the spleen from representative ALL-injected CTRL (CTRL + ALL), IFN non responder (IFN + ALL NR) and IFN responder (IFN + ALL R) mice. CD11b<sup>+</sup> cells from these mice were analysed by scRNA-seq. **b**, tSNE plots showing sub-cluster of cells within the non-classical monocyte population, coloured based on clustering (top plot) or experimental condition (bottom plot). Circled sub-clusters represent minor sub-clusters with dispersed composition and correspond to those marked by asterisks in Fig. 3i. **c**, Expression analysis by RT-qPCR of the indicated Th1, Th17, Th2 and Treg genes (mean fold-change over OVA-ALL-injected CTRL mice  $\pm$  SEM) in splenic CD4<sup>+</sup> T cells purified from OVA-ALL-injected IFN (n=6) and CTRL (n=5) mice, 9 days upon tumor injection. Each dot represents a mouse. \* $p < 0.05$ , Mann-Whitney.

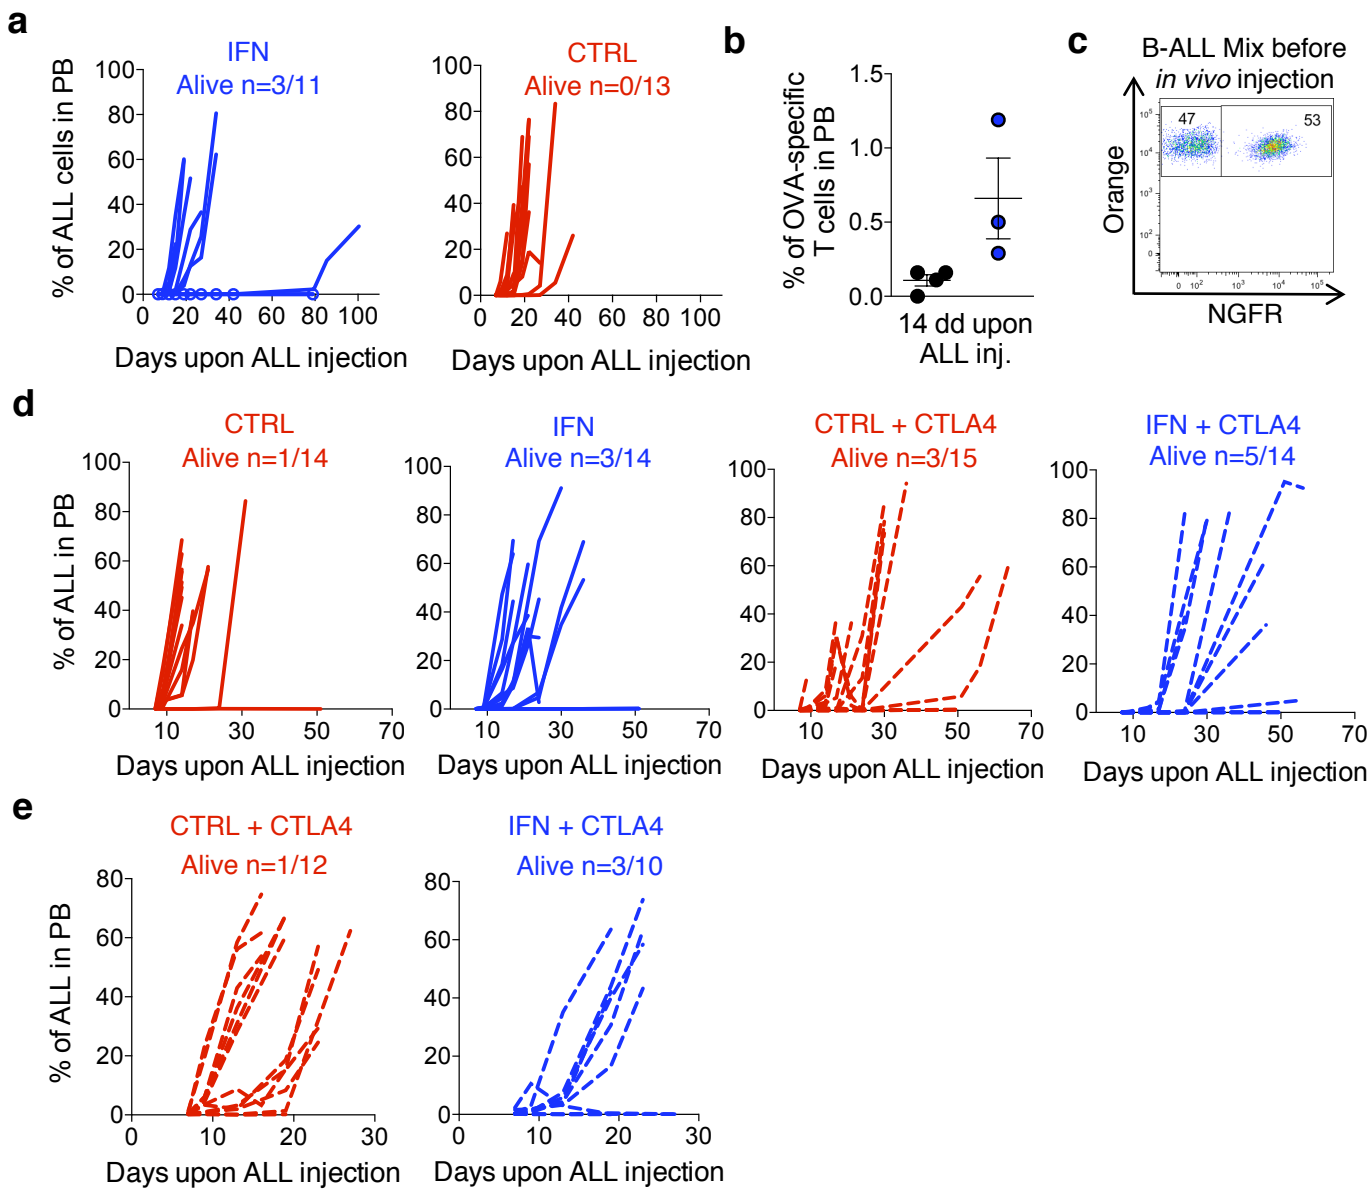

**Supplementary Figure 9. ALL growth kinetic in individual mice.** **a**, Percentage (mean  $\pm$  SEM) of OVA-ALL in the PB of each individual IFN (n=11) and CTRL (n=13) mouse. Each line represents a mouse. **b**, Percentage (mean  $\pm$  SEM) of OVA-specific T cells in surviving IFN mice (n=3, from Fig. 4a) vs. 4 naïve mice, 14 days upon second tumor challenge with OVA-ALL. Each dot represents a mouse. **c**, Representative flow cytometric plot showing the OVA-ALL and parental ALL cells mixed at 1 to 1 ratio before injection in the mice. **d, e**, Percentage (mean  $\pm$  SEM) of OVA-ALL in the PB of each individual (**d**) IFN (n=14), CTRL (n=14), IFN +  $\alpha$ CTLA4 (n=14) and CTRL +  $\alpha$ CTLA4 (n=15) mouse and (**e**) IFN +  $\alpha$ CTLA4 (n=10) and CTRL +  $\alpha$ CTLA4 (n=12) mouse. Each line represents a mouse.

**a****IFN****IFN - Fast  
Disease Course****IFN - Delayed  
Disease Course****IFN - Survivors**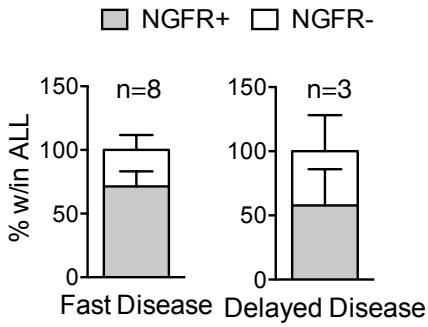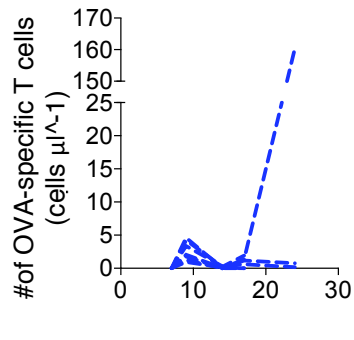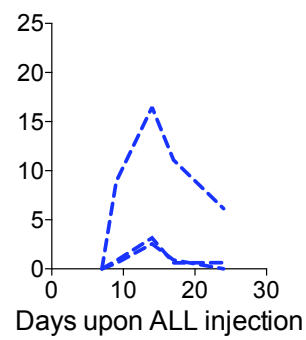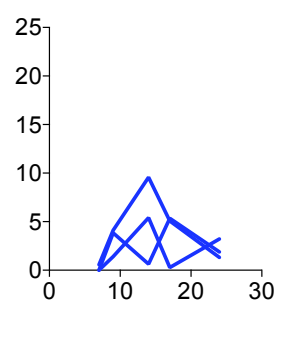**CTRL****CTRL - Fast  
Disease Course****CTRL - Delayed  
Disease Course****CTRL - Survivors**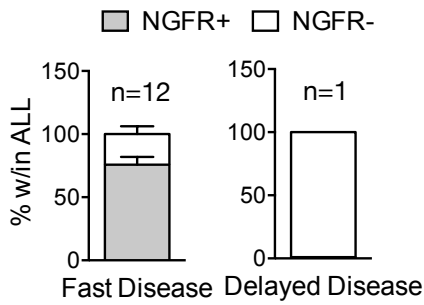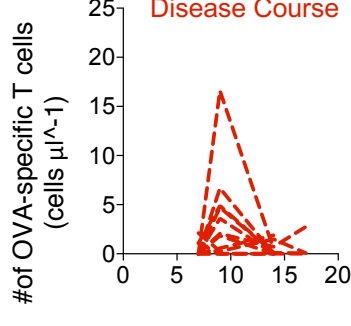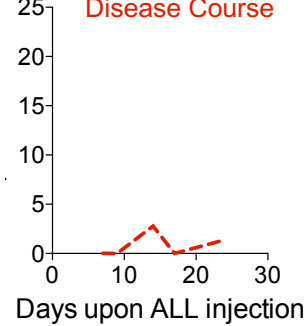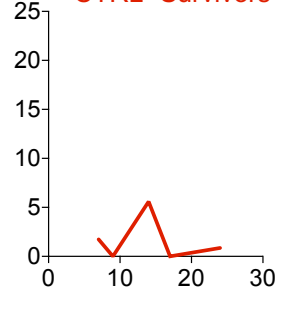**IFN + CTLA4****IFN + CTLA4 - Fast  
Disease Course****IFN + CTLA4 - Delayed  
Disease Course****IFN + CTLA4  
Survivors**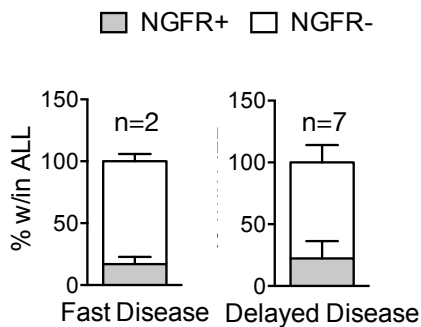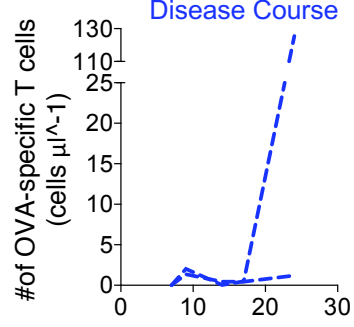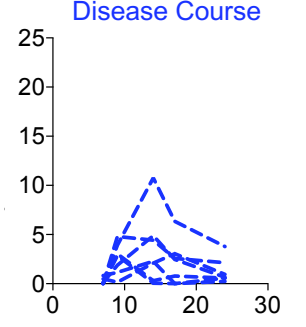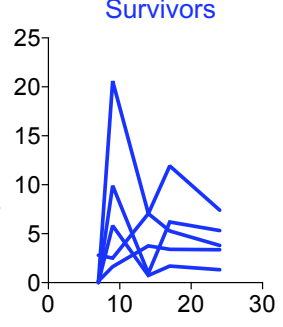**CTRL + CTLA4****CTRL + CTLA4 - Fast  
Disease Course****CTRL + CTLA4 - Delayed  
Disease Course****CTRL + CTLA4  
Survivors**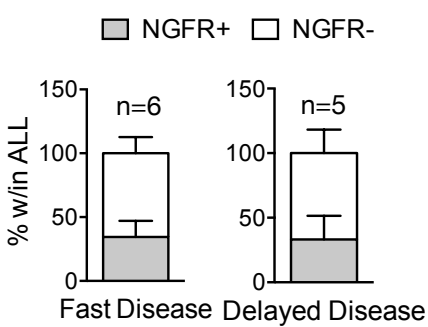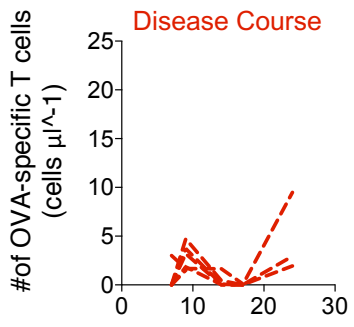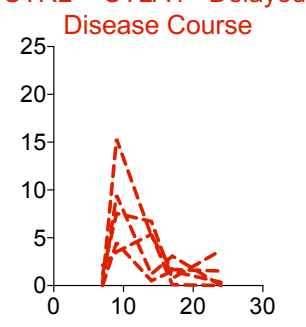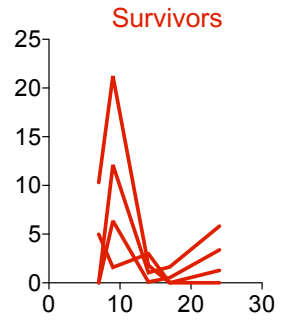



**Supplementary Figure 10. Immune-selection of OVA-negative ALL cells is enhanced in CTLA4-treated IFN and CTRL mice. a,** NGFR expression on BM-infiltrating ALL (or PB ALL for those mice for which BM analysis is not available) and absolute numbers (mean  $\pm$  SEM) of OVA-specific T cells (each line represents a mouse) in the PB of IFN (n=14), CTRL (n=14), IFN+ $\alpha$ CTLA4 (n=14) and CTRL+ $\alpha$ CTLA4 (n=15) mice showing fast, delayed disease course or long-term survival. Fast disease course: CTRL: 14-21 days (range), 15.66  $\pm$  0.8 (mean  $\pm$  SEM), n=12; IFN: 17-25 days, 21  $\pm$  1.3, n=8; CTRL + CTLA4: 14-21 days, 19  $\pm$  1.2, n=6; IFN + CTLA4: 25 days, 25  $\pm$  0, n=2; delayed disease course: CTRL: 36 days, n=1; IFN: 30-36 days, 34  $\pm$  2, n=3; CTRL + CTLA4, 30-64 days, 42  $\pm$  7.4, n=5; IFN + CTLA4: 25-64 days, 44  $\pm$  4.9, n=7). Surviving mice: CTRL: n=1; IFN: n=3, CTRL + CTLA4, n=4; IFN + CTLA4, n=5.

**a**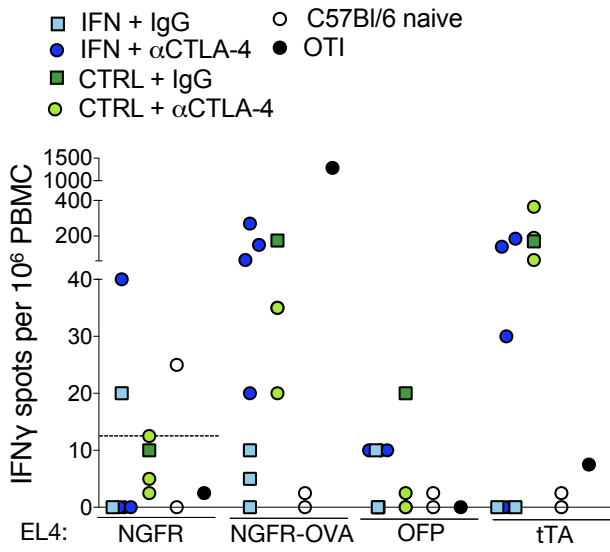**b**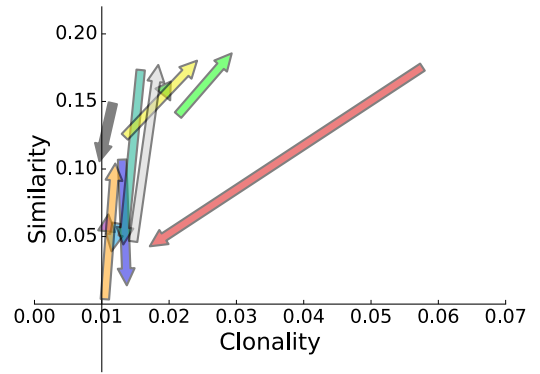**c**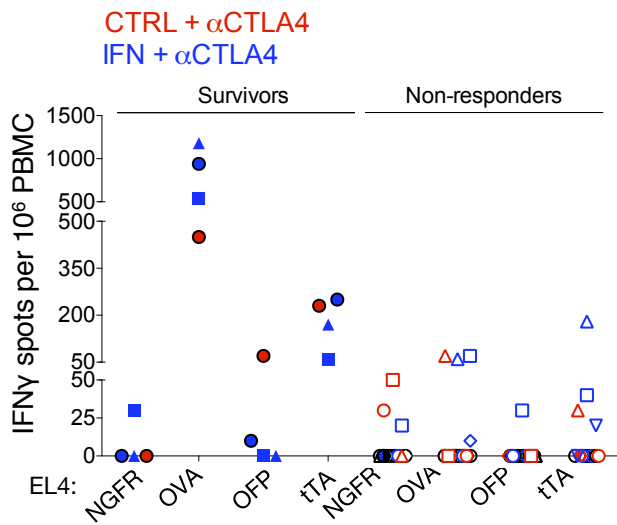

**Supplementary Figure 11. Combination of IFN gene therapy and CTLA blockade therapy promotes immune reactivity towards multiple tumor-specific surrogate antigens** **a**, PBMC from long-term surviving mice from Fig. 5a (IFN n=3, CTRL n=1, IFN +  $\alpha$ CTLA4 n=4, CTRL +  $\alpha$ CTLA4 n=3) 51 days upon tumor injection and from non-tumor bearing (OT-I, n=1 and transplanted CTRL mice, n=2) mice tested by IFN $\gamma$ -ELISPOT against the EL4 target cell line transduced with NGFR-OVA or NGFR-CD20 BdLV or PGK-OFP or PGK-tTA LV. The dashed line indicates the higher median background level seen against the EL4 NGFR-CD20 target cells. Each dot represents a mouse tested against all four tumor-specific surrogate antigens. **b**, Clonality and similarity of the TCR-beta CDR repertoire of tumor-free long-term surviving mice (each arrow represents a mouse) from Fig. 6b before OVA-ALL injection (start of the arrow, T<sub>0</sub>) and at 30 days upon OVA-ALL challenge (tip of the arrow, T<sub>1</sub>). **c**, PBMC from mice from Fig. 5d (IFN +  $\alpha$ CTLA-4 survivors, full blue symbols, n=3; CTRL +  $\alpha$ CTLA-4 survivors, full red symbols, n=1; IFN +  $\alpha$ CTLA-4 non-responders, empty blue symbols, n=7; CTRL +  $\alpha$ CTLA-4, empty red symbol, n=8 out of 12 non-responder controls) tested by IFN $\gamma$ -ELISPOT as in (a), 19 days upon tumor injection. Each dot represents a mouse tested against all four tumor-specific surrogate antigens.

**a**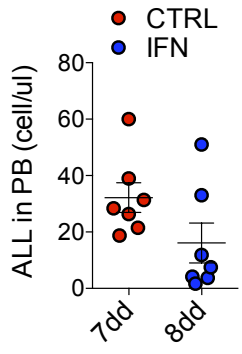**b**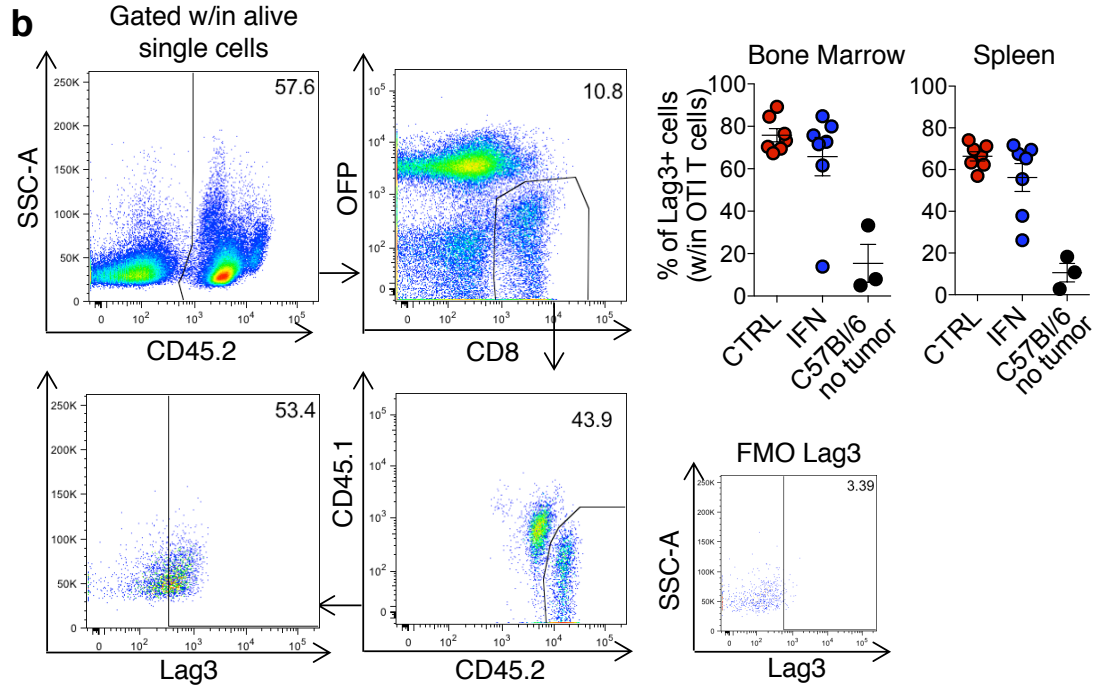**c**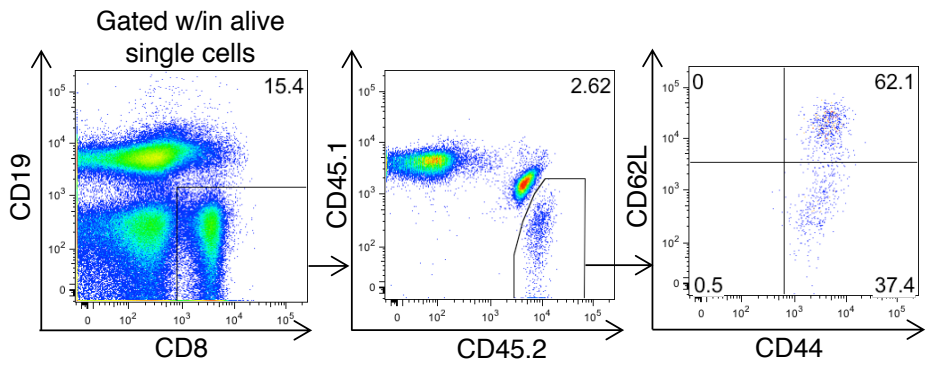

□ Naive □ Central Memory ■ Effector Memory

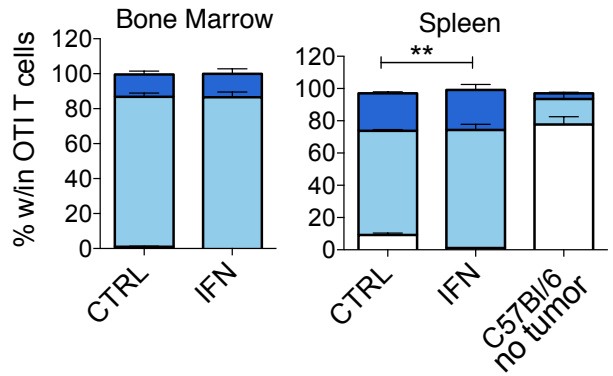**d**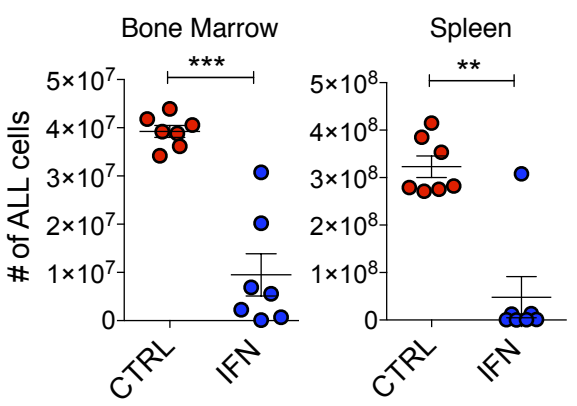**e**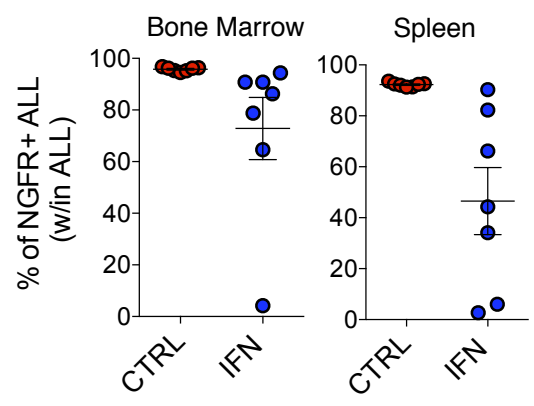

**Supplementary Figure 12. Adoptive transfer of OT-I T cells in OVA-ALL-injected CTRL, IFN and non-tumor bearing C57Bl/6 mice.** **a**, Absolute numbers (mean  $\pm$  SEM) of OVA-ALL in the PB of CTRL (n=7) and IFN (n=7) mice at the indicated time upon OT-I adoptive transfer. Each dot represents a mouse. **b**, Gating strategy and percentage of Lag3 positive OT-I T cells in BM and spleen of IFN (n= 7), CTRL (n=7) and non tumor-bearing (C57Bl/6 no tumor, n=3) mice, 3 days upon adoptive transfer of OT-I T cells. Each dot represents a mouse. Adoptively transferred OT-I T cells (CD45.2+) are identified by first excluding OVA-ALL cells by gating on CD19-CD8+ T cells. CD45.1 and CD45.2 markers are used to distinguish among radio-resistant recipient-derived CD8+ T cells (CD45.1+), donor-derived CD8+ T cells (CD45.1+CD45.2+) and adoptively transferred OT-I T cells (CD45.2+). In non tumor-bearing mice, adoptively transferred OT-I T cells are defined as CD8+ T cells and are distinguished from CD8+ recipient-derived T cells (CD45.1+) by gating on CD45.2+ CD8+ T cells. **c**, Gating strategy and percentage (mean  $\pm$  SEM) of naïve (CD44-CD62L+), central memory (CD44+CD62L+) and effector memory (CD44+CD62L-) cells within OT-I T cells in the BM and spleen of mice from Fig. 7g, 3 days upon adoptive transfer. OT-I T cells are identified as described in **(b)**, OVA-ALL are first excluded by gating on CD19-CD8+ T cells). \*\*p<0.01, nonparametric combination test. **d**, **e**, Absolute numbers of ALL **(d)** (mean  $\pm$  SEM) and NGFR expression on ALL **(e)** in BM and spleen from mice shown in Fig. 7g at 3 days upon adoptive transfer of OT-I T cells. Each dot represents a mouse. \*\*p<0.01, \*\*\*p<0.001, Mann-Whitney **(d)**.

**a**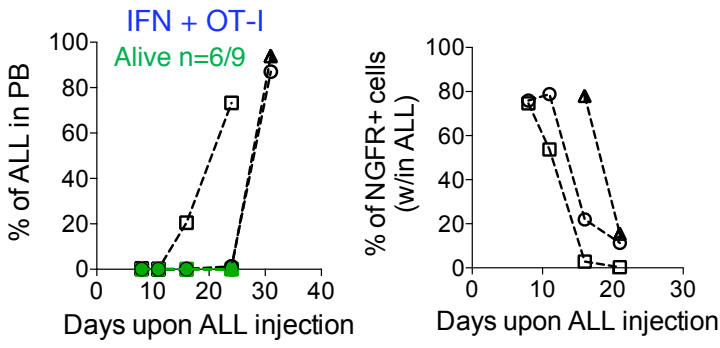**c**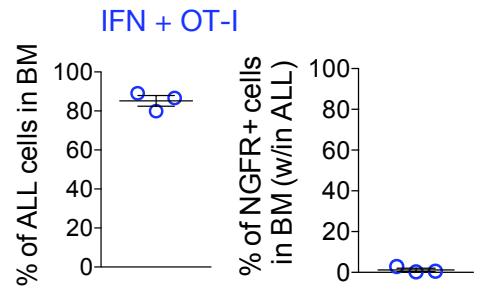**b**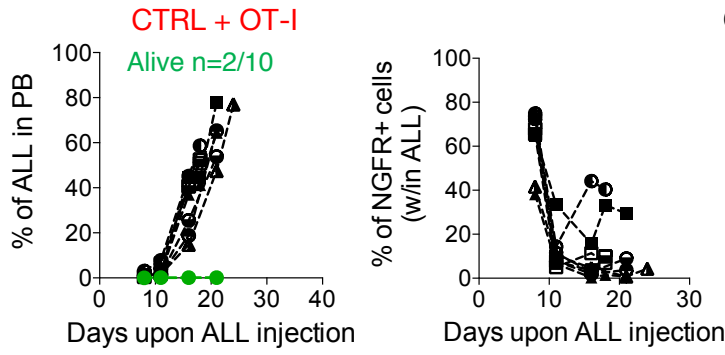**d**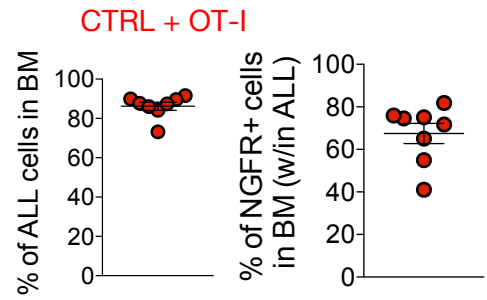**e**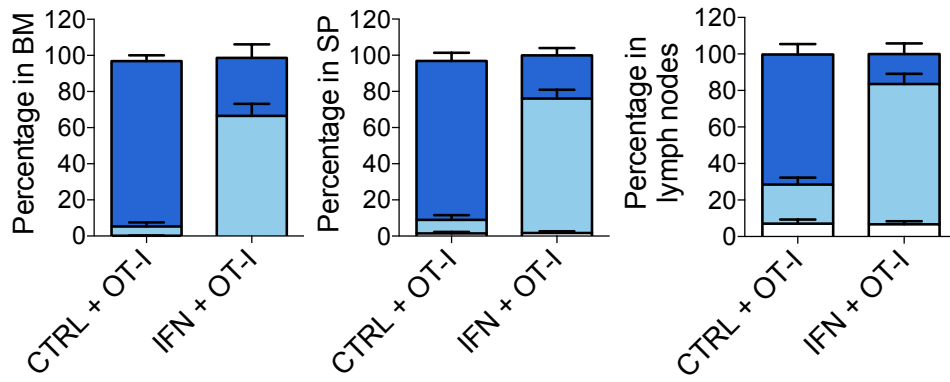**f**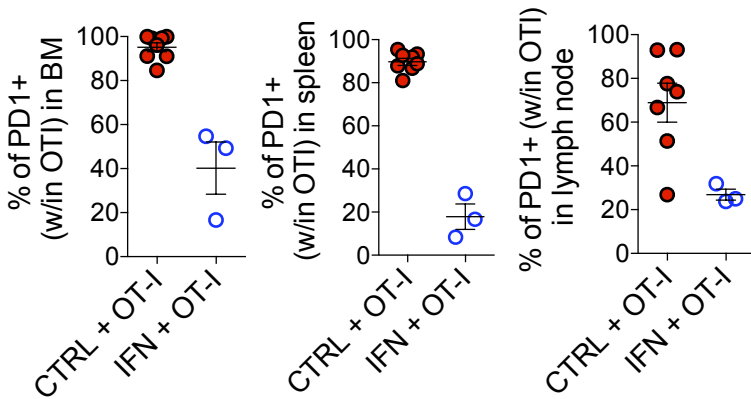

**Supplementary Figure 13. Adoptively transferred OT-I T cells expand and contain OVA-ALL in IFN mice. a, b, c, d,** Percentage (mean  $\pm$  SEM) of ALL cells and expression of the NGFR marker on ALL cells in the PB (**a, b**) and BM (**c, d**) of IFN + OT-I (n=9, **a, c**) and CTRL + OT-I (n=10, **b, d**) mice. Long-term surviving mice are shown in green. Note that NGFR expression is not shown for surviving mice that eradicate leukemia. Each mouse is represented as single dot (**b, d**) or line (**a, b**). **e, f,** Percentage (mean  $\pm$  SEM) of naive (CD62L+CD44-), central memory (CD62L+CD44+) and effector memory (CD62L-CD44+) OT-I T cells in the BM, spleen and lymph nodes of euthanized tumor-bearing mice from (**a, b, c, d**, CTRL + OT-I, n=8; IFN + OT-I, n=3). **f,** Percentage (mean  $\pm$  SEM) of PD1 expression on OT-I T cells present in the BM, spleen and lymph nodes of mice shown in (**e**). Each dot represents a mouse.

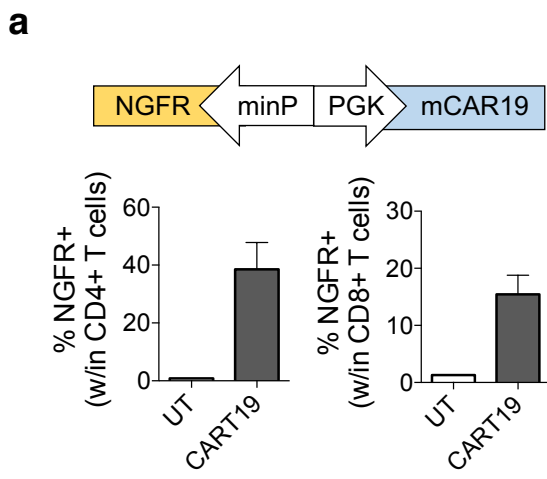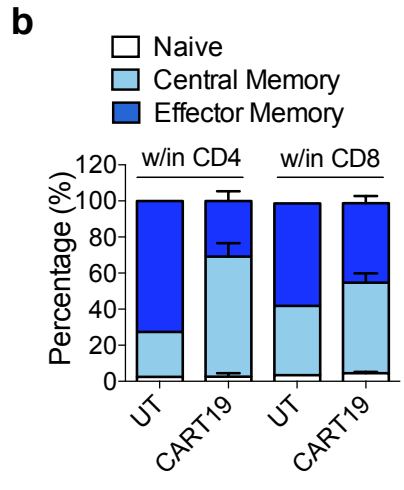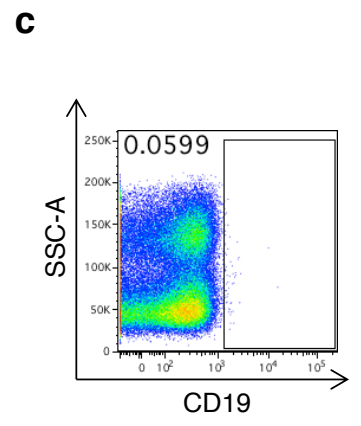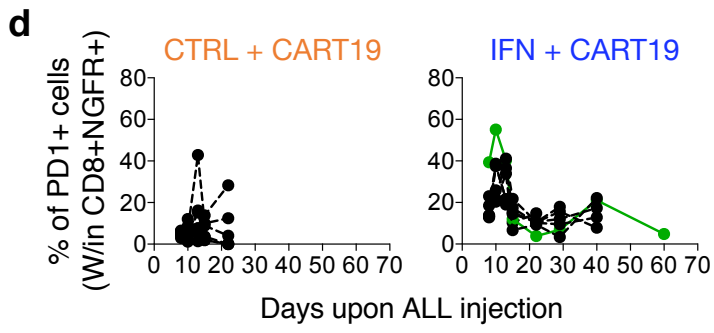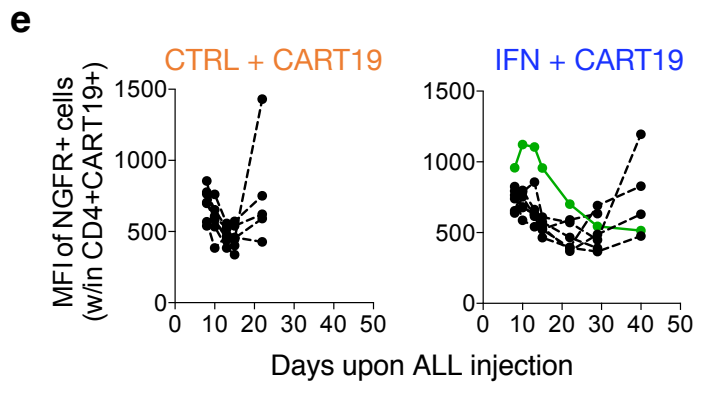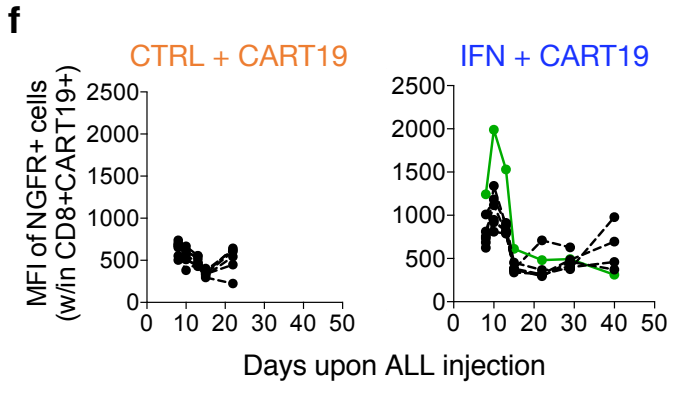



**Supplementary Figure 14. IFN gene therapy boosts the activation of CART19 cells. a,** Schematic representation of the bidirectional LV used to transduced mouse T cells and percentage of NGFR expression in un-transduced (UT) and transduced (CART19) CD4 and CD8 T cells prior to infusion in the mice from Fig. 8b. **b,** Percentage of naïve (CD62L+CD44+), central memory (CD62L+CD44+) and effector memory (CD62L-CD44+) UT or CART19 T cells prior to infusion in the mice from Fig. 8b. **c,** Representative flow cytometric plot of the IFN + CART19 surviving mouse from Fig. 8b and showing B cell aplasia in the PB. **d,** Percentage overtime (mean  $\pm$  SEM) of PD1 expression on CD8+NGFR+ CART19 cells from CTRL + CART19 (n=7) and IFN + CART19 (n=7) mice. Long-term surviving mice are shown in green. Each line represents a mouse. **e, f,** Level (mean fluorescent intensity, MFI) of NGFR expression overtime on CD4+ (**e**) and CD8+ (**f**) CART19 cells of mice from (**d**). Long-term surviving mice are shown in green. Each line represents a mouse.

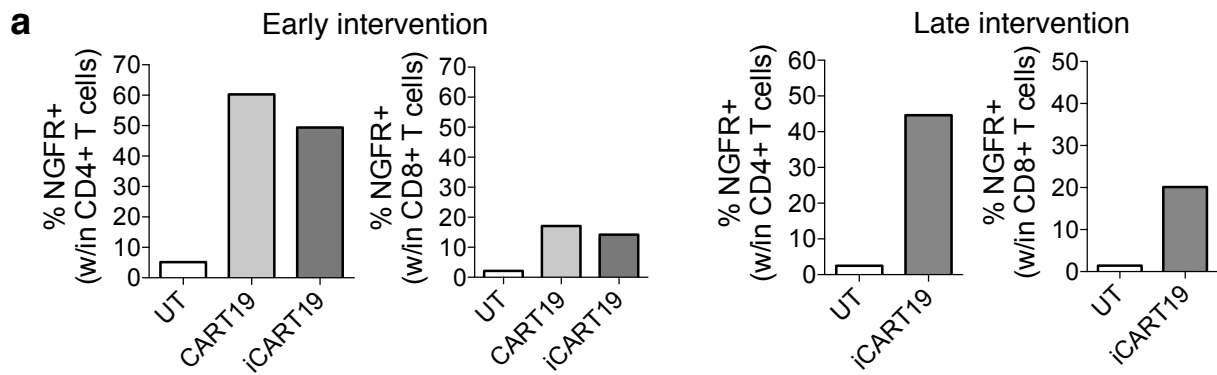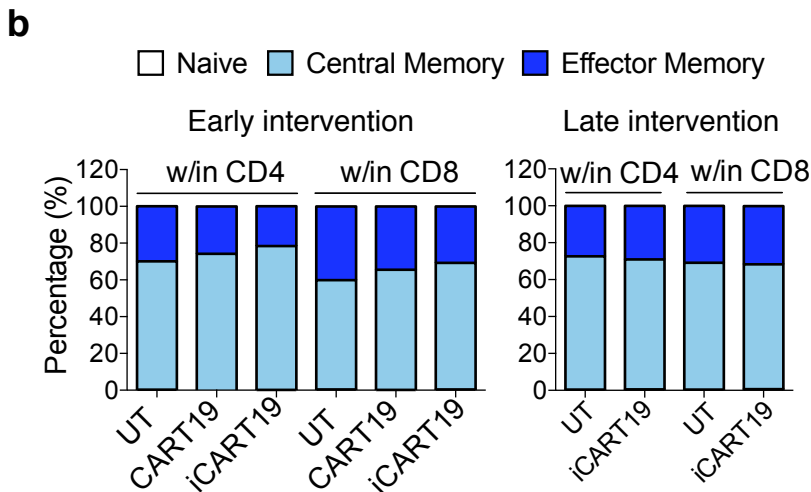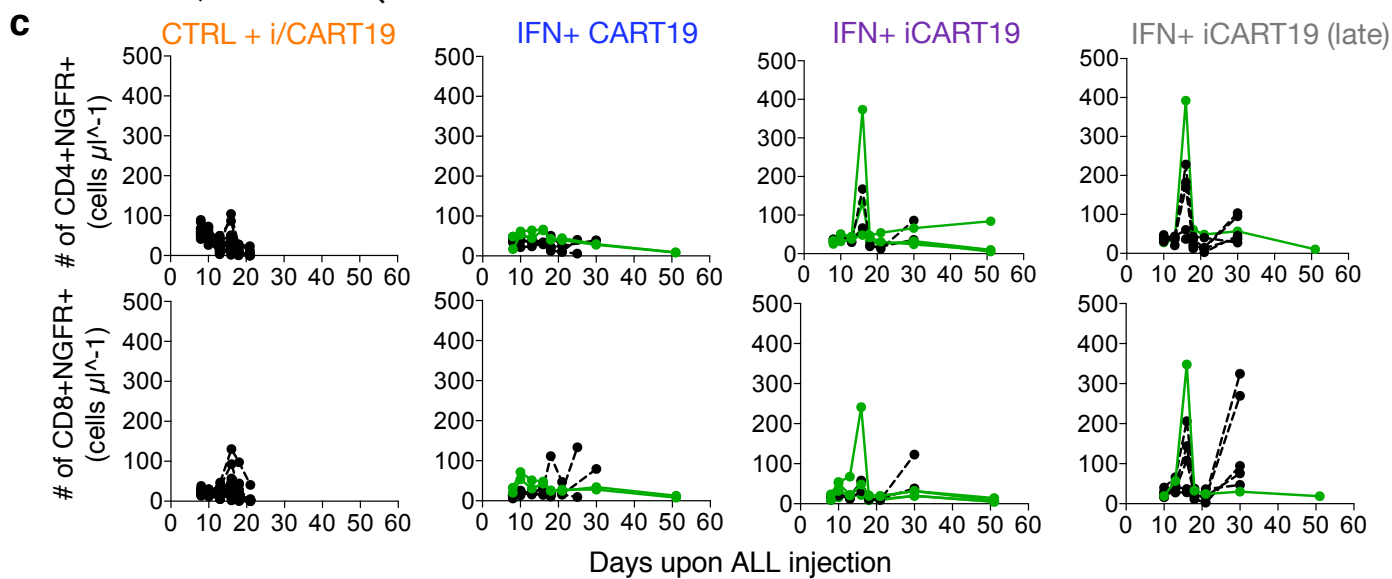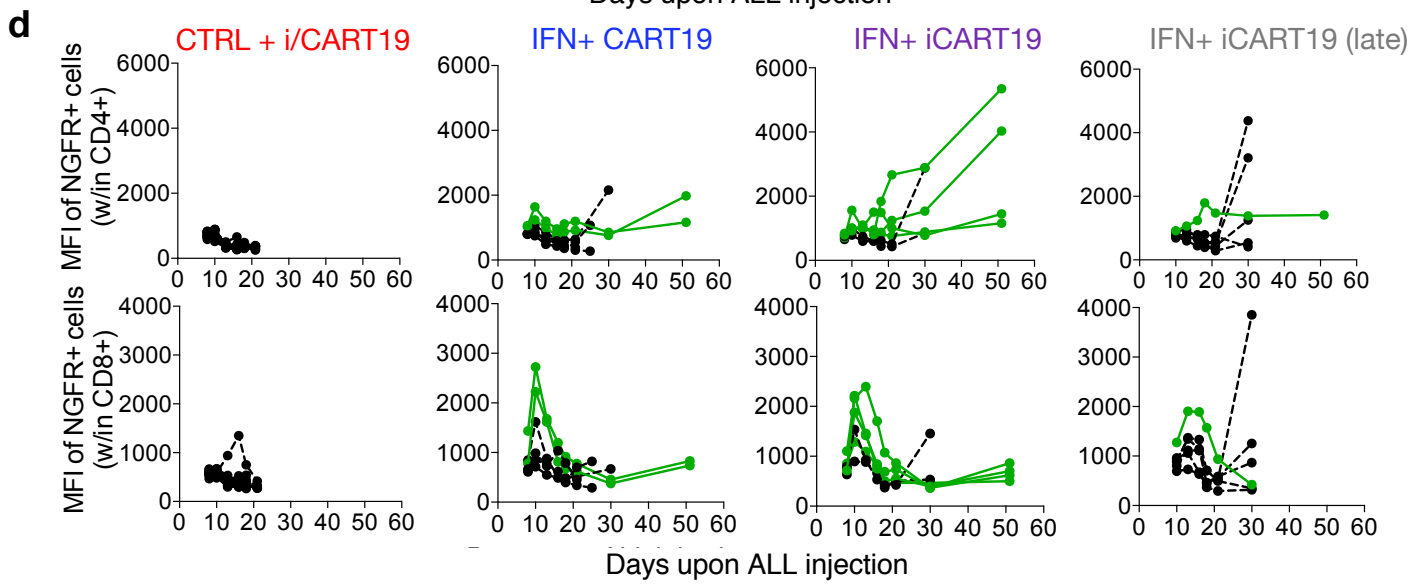

**Supplementary Figure 15. IFN gene therapy boosts the activation of iCART19 cells.** **a**, Percentage of NGFR expression in un-transduced (UT) and transduced (CART19) CD4 and CD8 T cells prior to infusion in the mice from Fig. 8e. **b**, Percentage of naïve (CD62L+CD44+), central memory (CD62L+CD44+) and effector memory (CD62L-CD44+) UT or CART19 T cells prior to infusion in the mice from Fig. 8e. **c**, Absolute numbers (mean  $\pm$  SEM) of CD4 (top) and CD8 (bottom) NGFR+ CART19 cells from CTRL + CART19 (n=7), IFN + CART19 (n=6), CTRL + iCART19 (n=7), IFN + iCART19 (n=6) and IFN + iCART19 late (n=6, late intervention trial) mice. Long-term surviving mice are shown in green. Each line represents a mouse. **d**, Level (mean fluorescent intensity, MFI) of NGFR expression overtime on CD4+ (top) and CD8+ (bottom) CART19 cells of mice from (c). Long-term surviving mice are shown in green. Each line represents a mouse.

**Antigen reactivity**  
(tested in vitro by  $\gamma$ -IFN-ELISPOT)

| Mouse                  | Group           | OVA | tTA | OFP | NGFR | Re-challenge with OVA+/OVA- mixed ALL                                                                                                                                                    |
|------------------------|-----------------|-----|-----|-----|------|------------------------------------------------------------------------------------------------------------------------------------------------------------------------------------------|
| C4-58<br>(Exp. Fig 5a) | CTRL<br>+ IgG   | ✓   | ✓   | ✓   |      | Alive                                                                                                                                                                                    |
| A0-58<br>(Exp. Fig 5a) | CTRL<br>+ CTLA4 | ✓   | ✓   |     |      | Alive                                                                                                                                                                                    |
| B3-58<br>(Exp. Fig 5a) | CTRL<br>+ CTLA4 | ✓   | ✓   |     |      | Alive                                                                                                                                                                                    |
| A2-62<br>(Exp. Fig 5a) | CTRL<br>+ CTLA4 | ✓   | ✓   |     |      | Found dead                                                                                                                                                                               |
| C1-73<br>(Exp. Fig 5d) | CTRL<br>+ CTLA4 | ✓   | ✓   | ✓   |      | Not Done                                                                                                                                                                                 |
| E3-58<br>(Exp. Fig 5a) | IFN<br>+ IgG    | ✓   |     |     | ✓    | Alive                                                                                                                                                                                    |
| F0-58<br>(Exp. Fig 5a) | IFN<br>+ IgG    | *   |     |     |      | Alive.<br>* Note that circulating OVA-specific T cells were detected by cytofluorimetric analysis on blood samples collected overtime and stained with the OVA-specific pentamer reagent |
| F3-62<br>(Exp. Fig 5a) | IFN<br>+ IgG    | ✓   |     | ✓   |      | Euthanized at 23 days upon re-challenge. The mouse shows the outgrowth of NGFR negative OFP negative ALL cells                                                                           |
| D3-77<br>(Exp. Fig 4f) | IFN             | ✓   | ✓   |     |      | Not Done                                                                                                                                                                                 |
| F4-77<br>(Exp. Fig 4f) | IFN             | ✓   | ✓   |     |      | Not Done                                                                                                                                                                                 |
| E1-58<br>(Exp. Fig 5a) | IFN<br>+ CTLA4  | ✓   | ✓   | ✓   | ✓    | Alive                                                                                                                                                                                    |
| G1-58<br>(Exp. Fig 5a) | IFN<br>+ CTLA4  | ✓   | ✓   | ✓   |      | Alive                                                                                                                                                                                    |
| E4-62<br>(Exp. Fig 5a) | IFN<br>+ CTLA4  | ✓   | ✓   |     |      | Alive                                                                                                                                                                                    |
| F0-62<br>(Exp. Fig 5a) | IFN<br>+ CTLA4  | ✓   |     |     | ✓    | Euthanized at 23 days upon re-challenge. The mouse shows the outgrowth of NGFR negative ALL cells. Within splenic CD8+ T lymphocytes, 10% are OVA-specific T cells.                      |
| F1-62<br>(Exp. Fig 5a) | IFN<br>+ CTLA4  | ✓   | ✓   | ✓   |      | Alive                                                                                                                                                                                    |
| E0-73<br>(Exp. Fig 5d) | IFN<br>+ CTLA4  | ✓   | ✓   |     |      | Not Done                                                                                                                                                                                 |
| F2-73<br>(Exp. Fig 5d) | IFN<br>+ CTLA4  | ✓   | ✓   |     |      | Not Done                                                                                                                                                                                 |
| F3-73<br>(Exp. Fig 5d) | IFN<br>+ CTLA4  | ✓   | ✓   |     | ✓    | Not Done                                                                                                                                                                                 |

**Supplementary Figure 16. Long-term surviving mice shows immune reactivity toward multiple surrogate TSA.** The table summarizes the reactivity of PBMC from surviving mice shown in Fig. 6f (IFN, n=2), Fig. 7a (CTRL, n=1; CTRL + aCTLA4, n=3; IFN, n=3; IFN + aCTLA4, n=5), Fig. 7d (CTRL + aCTLA4, n=1; IFN + aCTLA4, n=3) and tested by IFN $\gamma$ -ELISPOT (13 days upon tumor injection in Fig 6f; 51 days upon OVA-ALL injection (first challenge) in Fig. 7a; 19 days upon tumor injection in Fig. 7d). Target EL4 cells transduced with the PGK-tTA or PGK-OFP LVs or with the NGFR-CD20 or NGFR-OVA BdLVs are used for ex-vivo PBMC re-stimulation. Surviving mice from Fig. 7a are then re-challenge with a mix of OVA-ALL and parental ALL cells (mixed at 1:1 ratio). Results of tumor re-challenge and of BM and spleen examinations on euthanized mice are reported.

**Supplementary Table 1.** Shown is the list of antibodies used.

| <b>Antibody</b> | <b>Fluorochrome</b> | <b>Dilution</b> | <b>Clone</b> | <b>Company</b> | <b>Code</b> |
|-----------------|---------------------|-----------------|--------------|----------------|-------------|
| Annexin V       | PB                  | 1:10            |              | Biolegend      | 640918      |
| CD11b           | FITC                | 1:200           | M1/70        | BD             | 553310      |
| CD11b           | APC                 | 1:100           | M1/70        | BD             | 553312      |
| CD11b           | PE                  | 1:100           | M1/70        | BD             | 553311      |
| CD11b           | APC-Cy7             | 1:100           | M1/70        | Biolegend      | 101226      |
| CD11b           | PE                  | 1:100           | M1/70        | BD             | 562317      |
| CD11c           | PeCy7               | 1:100           | N418         | eBioscience    | 25-0114-82  |
| CD172a          | APC                 | 1:100           | P84          | eBioscience    | 17-1721-80  |
| CD19            | PE                  | 1:200           | 1D3          | BD             | 553786      |
| CD19            | PB                  | 1:100           | 6D5          | Biolegend      | 115526      |
| CD19            | PeCy7               | 1:100           | 6D5          | Biolegend      | 115520      |
| CD19            | APC                 | 1:200           | 1D3          | BD             | 550992      |
| CD19            | FITC                | 1:400           | 1D3          | BD             | 553785      |
| CD25            | APC                 | 1:100           | PC61         | BD             | 557192      |
| CD27            | PeCy7               | 1:100           | LG-7F9       | eBioscience    | 25-0271-80  |
| CD271           | Alexa647            | 1:50            | C40-1457     | BD             | 560326      |
| CD279           | APC                 | 1:100           | J43          | BD             | 562671      |
| CD279           | PB                  | 1:100           | 29F.1A12     | Biolegend      | 135202      |
| CD223           | PE                  | 1:100           | C9B7W        | BD             | 552380      |
| CD3             | PB                  | 1:100           | 17A2         | Biolegend      | 100214      |
| CD314           | Biotin              | 1:100           | A10          | eBioscience    | 13-5872-82  |
| CD335           | PE                  | 1:100           | 29A1.4       | Biolegend      | 137604      |
| CD3e            | FITC                | 1:200           | 145-2C11     | BD             | 553062      |
| CD3e            | PE                  | 1:50            | 145-2C11     | BD             | 553063      |
| CD4             | PeCy7               | 1:200           | GK1.5        | eBioscience    | 25-0041-82  |
| CD4             | PB                  | 1:100           | RM4-5        | BD             | 558107      |
| CD4             | PE                  | 1:200           | RM4-5        | BD             | 553049      |
| CD44            | APC                 | 1:200           | IM7          | BD             | 559250      |
| CD44            | BV421               | 1:100           | IM7          | BD             | 563970      |
| CD44            | FITC                | 1:250           | IM7          | BD             | 553133      |
| CD45.1          | APC780              | 1:300           | A20          | eBioscience    | 47-0453-82  |
| CD45.1          | FITC                | 1:100           | A20          | BD             | 553775      |
| CD45.1          | PeCy7               | 1:100           | A20          | Biolegend      | 110730      |
| CD45.2          | FITC                | 1:100           | 104          | BD             | 553772      |
| CD45.2          | PE                  | 1:100           | 104          | Biolegend      | 109807      |
| CD45.2          | PerCP-Cy5.5         | 1:100           | 104          | BD             | 552950      |

|              |                |       |                 |             |                |
|--------------|----------------|-------|-----------------|-------------|----------------|
| CD45.2       | PB             | 1:100 | 104             | Biologend   | 109820         |
| B220         | PE             | 1:100 | RA3-6B2         | BD          | 553090         |
| CD49b        | PerCPCy5.5     | 1:100 | DX5             | Biologend   | 108916         |
| CD62L        | PE             | 1:100 | MEL-14          | BD          | 553151         |
| CD8a         | FITC           | 1:100 | 53-6.7          | BD          | 553030         |
| CD8a         | PB             | 1:200 | 53-6.7          | BD          | 558106         |
| CD8a         | PE             | 1:200 | 53-6.7          | BD          | 533032         |
| CD8a         | PeCy7          | 1:200 | 53-6.7          | BD          | 552877         |
| CD8a         | APC780         | 1:150 | 53-6.7          | eBioscience | 47-0081-82     |
| CD20         | APCH7          |       | LT20            | Miltenyi    | 130-096-640    |
| F4/80        | APC            | 1:100 | A3-1            | Biorad      | MCA497CP<br>CT |
| FOXP3        | PE             | 1:100 | FJK-16s         | eBioscience | 12-5773-82     |
| I-A/I-E      | APC-Cy7        | 1:100 | M5/114.15<br>.2 | Biologend   | 107628         |
| I-Ab         | PerCP-Cy5.5    | 1:100 | AF6.120.1       | Biologend   | 116416         |
| IFN-g        | APC            | 1:100 | XMG1.2          | Biologend   | 505810         |
| Ki67         | Alexa647       | 1:10  | B56             | BD          | 558615         |
| Ki67         | PerCP-Cy5.5    | 1:10  | B56             | BD          | 561284         |
| Ly-6C        | APC-Cy7        | 1:100 | HK1.4           | Biologend   | 128026         |
| Ly-6G        | PE             | 1:200 | RB6-8C5         | eBioscience | 12-5931-83     |
| NGFR         | APC            |       | ME20.4-<br>1.H4 | Miltenyi    | 130-091-884    |
| NK.1.1       | FITC           | 1:100 | PK136           | BD          | 553164         |
| NK-1.1       | PB             | 1:100 | PK136           | Biologend   | 108722         |
| Streptavidin | Pacific orange | 1:50  |                 | Invitrogen  | 532365         |
| Ter119       | PE             | 1:500 | Ter-119         | BD          | 553673         |
| TIM3         | APC            | 1:100 | 8B.2C12         | eBioscience | 17-5871-80     |

**Supplementary Table 2.** Results of statistical analysis performed on Fig. 1c Analysis performed using Nonparametric methods for Longitudinal Data in Factorial Experiments (see Methods section for details). We let Group 1 = CTRL, Group 2 = CTRL + CTLA4, Group 3 = IFN, Group 4 = IFN + CTLA4. The effects of group and time on growth, as well as their interaction, have been evaluated in a two-way nonparametric ANOVA-type framework. From the analysis, we can conclude that group and time effects are significant, while groups' dynamics are similar over time.

| ANOVA-Type statistic |           |        |         |
|----------------------|-----------|--------|---------|
|                      | Statistic | df     | p-value |
| Group                | 22.6818   | 2.4406 | 0.0000  |
| Time                 | 225.9886  | 1.7873 | 0.0000  |
| Group:Time           | 1.5356    | 3.8203 | 0.1913  |

Pairwise comparisons:

Group 1 vs group 2: Pairwise comparison. Full factorial model has been estimated. After correction we observe only a significant effect of time. P-values adjusted by multiplicity are reported.

| ANOVA-Type statistics |           |        |               |               |               |
|-----------------------|-----------|--------|---------------|---------------|---------------|
|                       |           |        | not corrected | 6 comparisons | 3 comparisons |
|                       | Statistic | df     | p-value       | p-value       | p-value       |
| Group                 | 0.2096    | 1.0000 | 0.6471        | 1             | 1             |
| Time                  | 160.9945  | 1.9862 | 0.0000        | 0.0000        | 0.0000        |
| Group:Time            | 0.2990    | 1.9862 | 0.7400        | 1             | 1             |

Group 1 vs group 3: Pairwise comparison. Full factorial model has been estimated. After correction we observe a significant group and time effect. P-values adjusted by multiplicity are reported. Groups' dynamics are similar over time



| ANOVA-Type statistics |           |          |               |              |              |
|-----------------------|-----------|----------|---------------|--------------|--------------|
|                       |           |          | not corrected | 6comparisons | 3comparisons |
|                       | Statistic | df       | p-value       | p-value      | p-value      |
| Group                 | 8.288586  | 1        | 0.0040        | 0.0239       | 0.0120       |
| Time                  | 121.2533  | 1.754652 | 0.0000        | 0.0000       | 0.0000       |
| Group:Time            | 0.024141  | 1.754652 | 0.9647        | 1            | 1            |

Group 1 vs group 4. Pairwise comparison. Full factorial model has been estimated. After correction we observe a significant group and time effect. P-values adjusted by multiplicity are reported. Groups' dynamics are similar over time.

| ANOVA-Type statistics |           |          |               |               |
|-----------------------|-----------|----------|---------------|---------------|
|                       |           |          | not corrected | 6 comparisons |
|                       | Statistic | df       | p-value       | p-value       |
| Group                 | 84.65756  | 1        | 0.0000        | 0.0000        |
| Time                  | 64.444    | 1.724626 | 0.0000        | 0.0000        |
| Group:Time            | 0.263118  | 1.724626 | 0.7355        | 1             |

Group 2 vs group 3: Pairwise comparison. Full factorial model has been estimated. After correction we observe a significant group and time effect. P-values adjusted by multiplicity are reported. Groups' dynamics are similar over time.

| ANOVA-Type statistics |           |          |               |              |              |
|-----------------------|-----------|----------|---------------|--------------|--------------|
|                       |           |          | not corrected | 6comparisons | 3comparisons |
|                       | Statistic | df       | p-value       | p-value      | p-value      |
| Group                 | 8.074028  | 1        | 0.0045        | 0.0269       | 0.0135       |
| Time                  | 177.8822  | 1.640893 | 0.0000        | 0.0000       | 0.0000       |
| Group:Time            | 0.127261  | 1.640893 | 0.8404        | 1            | 1            |

Group 2 vs group 4: Pairwise comparison. Full factorial model has been estimated. After correction we observe a significant group and time effect. P-values adjusted by multiplicity are reported. Groups' dynamics are similar over time

| ANOVA-Type statistics |           |          |               |               |
|-----------------------|-----------|----------|---------------|---------------|
|                       |           |          | not corrected | 6 comparisons |
|                       | Statistic | df       | p-value       | p-value       |
| Group                 | 72.43085  | 1        | 0.0000        | 0.0000        |
| Time                  | 78.76083  | 1.515773 | 0.0000        | 0.0000        |
| Group:Time            | 0.978513  | 1.515773 | 0.3559        | 1             |

Group 3 vs group 4: Pairwise comparison. Full factorial model has been estimated. After correction we observe a significant group and time effect. P-values adjusted by multiplicity are reported. Groups' dynamics are similar over time.

| ANOVA-Type statistics |           |          |               |               |               |
|-----------------------|-----------|----------|---------------|---------------|---------------|
|                       |           |          | not corrected | 6 comparisons | 3 comparisons |
|                       | Statistic | df       | p-value       | p-value       | p-value       |
| Group                 | 12.20105  | 1        | 0.0005        | 0.0029        | 0.0014        |
| Time                  | 80.77027  | 1.497091 | 0.0000        | 0.0000        | 0.0000        |
| Group:Time            | 0.633509  | 1.497091 | 0.4867        | 1             | 1             |

**Supplementary Table 3.** Results of statistical analysis performed on Fig. 1d. Analysis performed using Nonparametric methods for Longitudinal Data in Factorial Experiments, by employing the package nparLD (see Methods section for details) referring to figure 1d. We let Group 1 = CTRL, Group 2 = IFN. We consider statistical significance at level  $\alpha = 0.05$ . Due to the aforementioned requirement for each mouse to be observed at all considered times, we omit mouse 2 (IFN group) from the analysis. An alternative approach which imputed the missing value with the mean of the previous and subsequent values for that mouse yielded similar results for the analysis. Hence, we decide to exclude the mouse altogether from the analysis. Nonparametric method for Longitudinal Data in Factorial Experiments has been applied. The effects of group and time on growth, as well as their interaction, have been evaluated in a two-way nonparametric ANOVA-type framework. We observe a significant effect of group and time but the interaction effect was not significant, meaning that the dynamics of the two groups are similar through time.

| ANOVA-Type statistic |           |        |         |
|----------------------|-----------|--------|---------|
|                      | Statistic | df     | p-value |
| Group                | 14.8094   | 1.0000 | 0.0001  |
| Time                 | 81.0775   | 1.1720 | 0.0000  |
| Group:Time           | 2.2470    | 1.1720 | 0.1295  |

**Supplementary Table 4.** Results of statistical analysis performed on Fig. 2d. Analysis performed using Nonparametric methods for Longitudinal Data in Factorial Experiments, by employing the package nparLD (see Methods section for details). We let Group 1 = CTRL, Group 2 = IFN Depleted, Group 3 = IFN. We consider statistical significance at level  $\alpha = 0.05$ . Due to the aforementioned requirement for each mouse to be observed at all considered times, we omit mouse 2 and mouse 5 (IFN Depleted group) from the analysis, as they their values are not observed at the last time point. Nonparametric methods for Longitudinal Data in Factorial Experiments. The effects of group and time on growth, as well as their interaction, have been evaluated in a two-way nonparametric ANOVA-type framework. From the analysis, we can conclude that there are significant group and time effects, as well as a significant interaction effect between time and each group, meaning that the groups' dynamics are not all equal.

| ANOVA-Type Statistic |           |         |
|----------------------|-----------|---------|
|                      | Statistic | p-value |
| Group                | 12.608    | 0.000   |
| Time                 | 213.942   | 0.000   |
| Group by Time        | 6.602     | 0.002   |

Pairwise comparisons:

Group 1 vs group 2: Pairwise comparison. Full factorial model has been estimated. We observe only a significant effect for difference over time. The two groups increase over time but there is no evidence for a significant difference between them. P-values adjusted by multiplicity are reported.

| ANOVA-Type Statistic |           |         |
|----------------------|-----------|---------|
|                      | Statistic | p-value |
| Group                | 0.754     | 1.000   |
| Time                 | 671.710   | 0.000   |
| Group by Time        | 1.374     | 0.740   |

Group 1 vs. Group 3: Pairwise comparison. Full factorial model has been estimated. We observe a significant group and time effect. This means that the two groups differ in level but they share the same dynamics over time. P-values adjusted by multiplicity are reported.

| ANOVA-Type Statistic |           |         |
|----------------------|-----------|---------|
|                      | Statistic | p-value |
| Group                | 21.414    | 0.000   |
| Time                 | 82.097    | 0.000   |
| Group by Time        | 3.936     | 0.109   |

Group 2 vs Group 3: Pairwise comparison. Full factorial model has been estimated. We observe a significant group and time effect. This means that the two groups differ in level but they share the same dynamics over time. P-values adjusted by multiplicity are reported.

| ANOVA-Type Statistic |           |         |
|----------------------|-----------|---------|
|                      | Statistic | p-value |
| Group                | 11.018    | 0.003   |
| Time                 | 71.081    | 0.000   |
| Group by Time        | 4.675     | 0.063   |

**Supplementary Table 5.** Results of statistical analysis performed on Fig. 7a. We performed a k-sample Log-rank test for the differences between the estimated survival curves (by Kaplan-Meier estimation method for the survival curves) for the four Groups CTRL, CTRL + CTLA4, IFN, IFN + CTLA4. All the subsequent p-values for the pairwise comparisons are adjusted for multiplicity. We performed three planned comparisons between the control group and all other groups.

Pairwise comparisons:

CTRL vs. CTRL + CTLA4: The hypothesis of equality between the two survival curves can be rejected (adjusted p-value = 0.04867367)

CTRL vs. IFN: The hypothesis of equality between the two survival curves can be rejected (adjusted p-value = 0.04557663)

CTRL vs. IFN + CTLA4: The hypothesis of equality between the two survival curves can be rejected here (adjusted p-value = 0.0006989215)

**Supplementary Table 6.** Results of statistical analysis performed on Fig. 7b. Group 1 = CTRL, Group 2 = IFN, Group 3 = CTRL +CTLA4, Group 4 = IFN+CTLA4. Nonparametric methods for Longitudinal Data in Factorial Experiments. The effects of group and time on growth, as well as their interaction, have been evaluated in a two-way nonparametric ANOVA-type framework. From the analysis, we can conclude that all the considered effects are significant, meaning that the groups' dynamics are not all equal over time.

| ANOVA-Type Statistic |           |         |
|----------------------|-----------|---------|
|                      | Statistic | p-value |
| Group                | 7.566     | 0.000   |
| Time                 | 61.645    | 0.000   |
| Group by Time        | 2.556     | 0.024   |

Pairwise comparisons:

Group 1 vs Group 2: Pairwise comparison. Full factorial model has been estimated. We observe a significant effect of group and time effects. The growth rate is similar between the two groups since the interaction term is not significant. P-values adjusted by multiplicity are reported.

| ANOVA-Type Statistic |           |         |
|----------------------|-----------|---------|
|                      | Statistic | p-value |
| Group                | 7.648     | 0.034   |
| Time                 | 28.132    | 0.000   |
| Group by Time        | 4.768     | 0.068   |

Group 1 vs Group 3: Pairwise comparison. Full factorial model has been estimated. We observe significant group and time effects. The interaction effect is not significant and thus we can conclude that both groups exhibit similar dynamics through time. P-values adjusted by multiplicity are reported.

| ANOVA-Type Statistic |           |         |
|----------------------|-----------|---------|
|                      | Statistic | p-value |
| Group                | 12.371    | 0.003   |
| Time                 | 14.345    | 0.000   |
| Group by Time        | 0.913     | 1.000   |

Group 1 vs Group 4: Pairwise comparison. Full factorial model has been estimated. We observe significant difference between the two groups and throughout time. However, the interaction effect is not significant and thus we can conclude that both groups exhibit similar dynamics through time. P-values adjusted by multiplicity are reported.

| ANOVA-Type Statistic |           |         |
|----------------------|-----------|---------|
|                      | Statistic | p-value |
| Group                | 20.339    | 0.000   |
| Time                 | 26.825    | 0.000   |
| Group by Time        | 3.700     | 0.158   |

Group 2 vs Group 3: Pairwise comparison. We find a significant effect of time, but group variable as well as the interaction group by time did not play a significant role in modulating the outcome variable. Thus, we can conclude that the two groups develop in the same way and do not exhibit significant differences at any stage. P-values adjusted by multiplicity are reported.

| ANOVA-Type Statistic |           |         |
|----------------------|-----------|---------|
|                      | Statistic | p-value |
| Group                | 0.235     | 1.000   |
| Time                 | 33.481    | 0.000   |
| Group by Time        | 2.403     | 0.556   |

Group 2 vs Group 4: Pairwise comparison. We observe only a significant difference between the times. Thus, we can conclude that the two groups develop the same way



and do not exhibit significant differences at any stage. P-values adjusted by multiplicity are reported.

| ANOVA-Type Statistic |           |         |
|----------------------|-----------|---------|
|                      | Statistic | p-value |
| Group                | 2.042     | 0.918   |
| Time                 | 50.609    | 0.000   |
| Group by Time        | 0.203     | 1.000   |

Group 3 vs Group 4: Pairwise comparison. Full factorial model has been estimated. We observe only a significant effect of time factor. Hence, the two groups develop the same way and do not exhibit significant differences at any stage. P-values adjusted by multiplicity are reported.

| ANOVA-Type Statistic |           |         |
|----------------------|-----------|---------|
|                      | Statistic | p-value |
| Group                | 1.135     | 1.000   |
| Time                 | 31.976    | 0.000   |
| Group by Time        | 3.147     | 0.281   |

**Supplementary Table 7.** Results of statistical analysis performed on Fig. 7i.

We performed a k-sample Log-rank test for the differences between the estimated survival curves (by Kaplan-Meier estimation method for the survival curves) for the three Groups CTRL, CTRL + OTI, IFN + OT-I. All the subsequent p-values for the pairwise comparisons are adjusted for multiplicity.

Pairwise comparisons:

CTRL vs. CTRL + OTI: The hypothesis of equality between the two survival curves cannot be rejected (adjusted p-value = 0.1513032)

CTRL vs. IFN + OTI: The hypothesis of equality between the two survival curves can be rejected (adjusted p-value = 9.181594e-05)

CTRL + OTI vs. IFN + OTI: The hypothesis of equality between the two survival curves can be rejected (adjusted p-value = 0.03864594)

**Supplementary Table 8.** Results of statistical analysis performed on Fig. 8b.

Group 1 = CTRL + CTRLT, Group 2 = CTRL + CART19, Group 3 = IFN + CTRLT, Group 4 = IFN + CART19. Nonparametric methods for Longitudinal Data in Factorial Experiments. The effects of group and time on growth, as well as their interaction, have been evaluated in a two-way nonparametric ANOVA-type framework. We conclude that all the considered effects (group, time and group by time interaction) are significant.

| ANOVA-Type Statistic |           |         |
|----------------------|-----------|---------|
|                      | Statistic | p-value |
| Group                | 68.508    | 0.000   |
| Time                 | 112.472   | 0.000   |
| Group by Time        | 9.812     | 0.000   |

Pairwise comparisons:

Pairwise comparison (Group 1 vs group 2). Full factorial model has been estimated. We observe only a significant effect of time. Group effect as well as the interaction term are not significant. Thus, we can conclude that the two groups develop in the same way and do not exhibit significant differences at any stage. P-values adjusted by multiplicity are reported.

| ANOVA-Type Statistic (ATS) |           |         |
|----------------------------|-----------|---------|
|                            | Statistic | p-value |
| Group                      | 0.919     | 1.000   |
| Time                       | 184.497   | 0.000   |
| Group by Time              | 0.858     | 1.000   |

Pairwise comparison (Group 1 vs group 3). Full factorial model has been estimated. We observe a significant difference between the groups and throughout time (significant group and time effects). We conclude that the growth rate is similar between the two groups. P-values adjusted by multiplicity are reported.

| ANOVA-Type Statistic (ATS) |           |         |
|----------------------------|-----------|---------|
|                            | Statistic | p-value |
| Group                      | 43.904    | 0.000   |
| Time                       | 228.729   | 0.000   |
| Group by Time              | 1.254     | 1.000   |

Pairwise comparison (Group 1 vs group 4). Full factorial model has been estimated. We observe a significant difference between the groups and throughout time (significant group and time effects). After adjustment for multiplicity, the interaction effect is not significant. P-values adjusted by multiplicity are reported

| ANOVA-Type Statistic (ATS) |           |         |
|----------------------------|-----------|---------|
|                            | Statistic | p-value |
| Group                      | 100.269   | 0.000   |
| Time                       | 7.297     | 0.001   |
| Group by Time              | 2.970     | 0.226   |

Pairwise comparison (Group 2 vs group 3). Full factorial model has been estimated. We observe a significant difference between the groups and throughout time (significant group and time effects). Since the interaction effect is not significant, we conclude that the growth rate is similar between the two groups. P-values adjusted by multiplicity are reported.

| ANOVA-Type Statistic (ATS) |           |         |
|----------------------------|-----------|---------|
|                            | Statistic | p-value |
| Group                      | 25.104    | 0.000   |
| Time                       | 268.864   | 0.000   |
| Group by Time              | 1.165     | 1.000   |

Pairwise comparison (Group 2 vs group 4). Full factorial model has been estimated. All tested effects are significant (group, time and group by time interaction). P-values

adjusted by multiplicity are reported.

| ANOVA-Type Statistic (ATS) |           |         |
|----------------------------|-----------|---------|
|                            | Statistic | p-value |
| Group                      | 70.802    | 0.000   |
| Time                       | 10.912    | 0.000   |
| Group by Time              | 5.554     | 0.010   |

Pairwise comparison (Group 3 vs group 4). Full factorial model has been estimated. We observe a significant effect of time and group. After adjustment for multiplicity, the interaction effect is not significant. P-values adjusted by multiplicity are reported.

| ANOVA-Type Statistic (ATS) |           |         |
|----------------------------|-----------|---------|
|                            | Statistic | p-value |
| Group                      | 20.669    | 0.000   |
| Time                       | 7.684     | 0.002   |
| Group by Time              | 3.748     | 0.124   |

**Supplementary Table 9.** Results of statistical analysis performed on Fig. 8e.

Group 1 = CTRL + CTRLT, Group 2 = CTRL + CART19, Group 3 = CTRL + iCART19, Group 4 = IFN + CTRLT, Group 5 = IFN + CART19, Group 6 = IFN + iCART19. Nonparametric methods for Longitudinal Data in Factorial Experiments. The effects of group and time on growth, as well as their interaction, have been evaluated in a two-way nonparametric ANOVA-type framework. All the considered effects (group, time and time by group interaction) are significant.

| ANOVA-Type Statistic (ATS): |           |       |         |
|-----------------------------|-----------|-------|---------|
|                             | Statistic | df    | p-value |
| Group                       | 25.569    | 2.625 | 0.000   |
| Time                        | 189.852   | 2.553 | 0.000   |
| Group by Time               | 8.256     | 5.957 | 0.000   |

Pairwise comparisons:

Pairwise comparison (Group 1 vs group 2). Full factorial model has been estimated. We find only a significant effect of time. Group effect as well as the interaction term (after adjustment for multiplicity) are not significant. Thus, we can conclude that the two groups develop in the same way. P-values adjusted by multiplicity are reported.

| ANOVA-Type Statistic (ATS) |           |         |
|----------------------------|-----------|---------|
|                            | Statistic | p-value |
| Group                      | 2.418     | 0.720   |
| Time                       | 268.964   | 0.000   |
| Group by Time              | 4.214     | 0.069   |

Pairwise comparison (Group 1 vs group 3). We find a significant effect of time and of the interaction term, indicating that the shape of the growth curves differed across groups (hence groups develop in a different way at some time points). P-values adjusted by multiplicity are reported.

| ANOVA-Type Statistic (ATS) |           |         |
|----------------------------|-----------|---------|
|                            | Statistic | p-value |
| Group                      | 1.490     | 1.000   |
| Time                       | 321.616   | 0.000   |
| Group by Time              | 7.258     | 0.002   |

Pairwise comparison (Group 2 vs group 3). Full factorial model has been estimated. We find only a significant effect of time. Group and interaction terms are not significant. Thus, we can conclude that the two groups develop in the same way and do not exhibit significant differences at any stage. P-values adjusted by multiplicity are reported.

| ANOVA-Type Statistic (ATS) |           |         |
|----------------------------|-----------|---------|
|                            | Statistic | p-value |
| Group                      | 0.002     | 1.000   |
| Time                       | 207.671   | 0.000   |
| Group by Time              | 0.804     | 1.000   |

Pairwise comparison (Group 5 vs group 6). Full factorial model has been estimated. We find only a significant effect of time. P-values adjusted by multiplicity are reported.

| ANOVA-Type Statistic (ATS) |           |         |
|----------------------------|-----------|---------|
|                            | Statistic | p-value |
| Group                      | 0.072     | 1.000   |
| Time                       | 8.247     | 0.000   |
| Group by Time              | 0.942     | 1.000   |

Pairwise comparison (Group 2 vs group 5). Full factorial model has been estimated. From the analysis, we can conclude that all the considered effects (group, time and group by time interaction) are significant. P-values adjusted by multiplicity are reported.

| ANOVA-Type Statistic (ATS) |           |         |
|----------------------------|-----------|---------|
|                            | Statistic | p-value |
| Group                      | 23.722    | 0.000   |
| Time                       | 37.786    | 0.000   |
| Group by Time              | 5.283     | 0.030   |

Pairwise comparison (Group 3 vs group 6). Full factorial model has been estimated. We conclude that all the considered effects (group, time and group by time interaction) are significant. P-values adjusted by multiplicity are reported.

| ANOVA-Type Statistic (ATS) |           |         |
|----------------------------|-----------|---------|
|                            | Statistic | p-value |
| Group                      | 67.813    | 0.000   |
| Time                       | 24.792    | 0.000   |
| Group by Time              | 8.405     | 0.000   |



**Supplementary Table 10.** Results of statistical analysis performed on Fig. 8e.

Group 3 = CTRL + iCART19, Group 6 = IFN + iCART19, Group 8 = IFN + iCART19 (late). Nonparametric methods for Longitudinal Data in Factorial Experiments. The effects of group and time on growth, as well as their interaction, have been evaluated in a two-way nonparametric ANOVA-type framework. Only time points, common to all groups, have been considered. From the analysis, we can conclude that all the considered effects (group, time and group by time interaction) are significant.

| ANOVA-Type Statistic (ATS): |           |       |         |
|-----------------------------|-----------|-------|---------|
|                             | Statistic | df    | p-value |
| Group                       | 35.401    | 1.825 | 0.000   |
| Time                        | 17.180    | 2.485 | 0.000   |
| Group by Time               | 3.426     | 3.988 | 0.008   |

Pairwise comparisons:

Pairwise comparison (Group 3 and Group 8). From the analysis, we can conclude that all the considered effects (group, time and time by group interaction) are significant. P-values adjusted by multiplicity are reported.

| ANOVA-Type Statistic (ATS) |           |         |
|----------------------------|-----------|---------|
|                            | Statistic | p-value |
| Group                      | 62.752    | 0.000   |
| Time                       | 48.898    | 0.000   |
| Group by Time              | 8.229     | 0.000   |

Pairwise comparison (Group 6 and Group 8). Full factorial model has been estimated. We find only a significant effect of time. Group and interaction effects are not significant. Thus, we conclude that the two groups develop in the same way and do not exhibit significant differences at any stage. P-values adjusted by multiplicity are reported.

| ANOVA-Type Statistic (ATS) |           |         |
|----------------------------|-----------|---------|
|                            | Statistic | p-value |
| Group                      | 2.695     | 0.201   |
| Time                       | 7.456     | 0.000   |
| Group by Time              | 1.892     | 0.276   |

**Supplementary Table 11.** Results of statistical analysis performed on Fig. 8g.

We performed a k-sample Log-rank test for evaluating the differences among the estimated survival curves (by Kaplan-Meier estimation method for the survival curves) for the 4 groups CTRL + i/CART19, IFN + CART19, IFN + iCART19, IFN + iCART19 (late). All the subsequent p-values for the pair-wise comparisons are adjusted for multiplicity. Five comparisons in total have been considered.

| Comparison                              | Adjusted <i>p</i> -value |
|-----------------------------------------|--------------------------|
| CTRL + i/CART19 vs IFN + CART19         | 0.0000                   |
| CTRL + i/CART19 vs IFN + iCART19        | 0.0001                   |
| CTRL + i/CART19 vs IFN + iCART19 (late) | 0.0001                   |
| IFN + CART19 vs IFN + iCART19           | 0.6326                   |
| IFN + CART19 vs IFN + iCART19 late      | 1.0000                   |
